# Supplementary material for: Climate Exposure of US National Parks in a New Era of Change
Source: PubMed Central journal article supplement (PMC4079655; doi:10.1371/journal.pone.0101302), 2014-07-02
Supplement: pone.0101302.s001.pdf [file pone.0101302.s001.pdf]

Appendix S1. Mean percentile and maximum difference in percentile (in parentheses) for moving window means: annual mean temperature (Bio1), mean diurnal range (Bio2), isothermality (Bio3), temperature seasonality (Bio4), maximum temperature of the warmest month (Bio5), and minimum temperature of the coldest month (Bio6).

| Park                                                | Bio1        | Bio2        | Bio3        | Bio4        | Bio5        | Bio6        |
|-----------------------------------------------------|-------------|-------------|-------------|-------------|-------------|-------------|
| Abraham Lincoln Birthplace National Historical Park | 99.7 (1)    | 5.6 (5.1)   | 9.8 (3.1)   | 20.1 (40.3) | 55.1 (12.5) | 89.1 (26.2) |
| Acadia National Park                                | 100 (0)     | 29.2 (28.1) | 49.4 (49.2) | 22.4 (46.4) | 98.6 (2.9)  | 95.5 (13.6) |
| Agate Fossil Beds National Monument                 | 98 (3.2)    | 65.1 (39.9) | 74.6 (11.5) | 38.9 (35.4) | 97.7 (6.8)  | 97.7 (6.8)  |
| Ala Kahakai National Historic Trail                 | 77.8 (0.9)  | 7.5 (19.5)  | 15.9 (25)   | 78.1 (37.7) | 67.3 (16.7) | 96.2 (6.5)  |
| Alagnak Wild River                                  | 80.4 (24.3) | 69.2 (11.5) | 53.2 (14.7) | 49.4 (41.2) | 77.9 (32.1) | 45.7 (35.7) |
| Alibates Flint Quarries National Monument           | 92.8 (21.7) | 64.8 (13.3) | 88.8 (9)    | 10 (10.7)   | 71.6 (17)   | 97.1 (8.7)  |
| Allegheny Portage Railroad National Historic Site   | 73.5 (19.2) | 1.1 (0.2)   | 20.1 (30.1) | 17.8 (32.8) | 37.9 (7)    | 84.5 (19.6) |
| American Memorial Park                              | 93.5 (10.8) | 83.6 (17.6) | 66.9 (12.6) | 46.3 (25.7) | 75.5 (15.6) | 81.1 (3.5)  |
| Amistad National Recreation Area                    | 98.7 (3.9)  | 98.1 (5.8)  | 95.2 (5.6)  | 15.6 (5.2)  | 96.8 (9.7)  | 89.6 (19.7) |
| Anacostia Park                                      | 98.6 (4.3)  | 6 (7.6)     | 23.9 (27.6) | 39.6 (45.3) | 81.4 (19.5) | 83.8 (17.8) |
| Aniakchak National Monument and Preserve            | 79.7 (23.1) | 70.6 (21.9) | 50.8 (16.4) | 60.9 (50)   | 93.6 (3.5)  | 40 (45.4)   |
| Antietam National Battlefield                       | 67.6 (34.3) | 1.4 (1.2)   | 19.2 (25.3) | 22.3 (47.3) | 34.7 (21.2) | 68.2 (18.1) |
| Apostle Islands National Lakeshore                  | 99 (1.9)    | 2.4 (2.7)   | 3.1 (6.3)   | 16.7 (34.7) | 74 (41.2)   | 89.4 (24.3) |
| Appalachian National Scenic Trail                   | 100 (0)     | 1.8 (0.9)   | 21.4 (27.6) | 18 (37.6)   | 70.8 (15)   | 91.8 (21.4) |
| Appomattox Court House National Historical Park     | 98 (4.8)    | 7 (4.3)     | 7.3 (6.5)   | 26 (44.2)   | 77.9 (37.4) | 79.2 (18.6) |
| Arches National Park                                | 88.4 (17)   | 99 (2.9)    | 91.5 (24.3) | 32.4 (70.5) | 99 (2.9)    | 82.2 (41.6) |
| Arkansas Post National Memorial                     | 67.5 (17.4) | 4.4 (7.5)   | 7.1 (8.5)   | 55 (16.6)   | 69.1 (9.1)  | 97.9 (2.8)  |
| Assateague Island National Seashore                 | 100 (0)     | 1.7 (1.8)   | 7.3 (3.7)   | 88.3 (25.5) | 100 (0)     | 87.8 (29.1) |
| Aztec Ruins National Monument                       | 97.4 (7.8)  | 54.3 (53.8) | 66.3 (20.3) | 34.1 (54)   | 99.7 (1)    | 91.4 (22.3) |
| Badlands National Park                              | 79.3 (13.4) | 79.8 (15.4) | 87.4 (19.7) | 28 (49.1)   | 84.5 (6.7)  | 98.1 (5.8)  |
| Baltimore-Washington National Parkway               | 100 (0)     | 26.2 (30.1) | 30 (27.1)   | 45 (45.5)   | 94.2 (8.7)  | 81.9 (16.3) |
| Bandelier National Monument                         | 99.7 (1)    | 6.5 (11.4)  | 37.3 (26)   | 11.4 (15)   | 80.1 (25)   | 94.8 (10.7) |
| Bent's Old Fort National Historic Site              | 100 (0)     | 80.2 (22.8) | 80.9 (27.5) | 34 (40.9)   | 97.1 (4.8)  | 91.9 (14.1) |
| Bering Land Bridge National Preserve                | 93.2 (8.6)  | 21.8 (2.1)  | 24.6 (7.5)  | 43.9 (67.3) | 84 (9.8)    | 84.2 (12.5) |
| Big Bend National Park                              | 100 (0)     | 83.9 (19.7) | 84.8 (15.8) | 52.2 (26)   | 99.4 (1.9)  | 93.4 (11.5) |
| Big Cypress National Preserve                       | 99.2 (1.2)  | 3 (5.7)     | 20.8 (31.3) | 63.2 (37.4) | 94.7 (3.9)  | 87.1 (30.1) |
| Big Hole National Battlefield                       | 99 (2.2)    | 25.1 (18.9) | 88 (34)     | 9.4 (21.3)  | 95.7 (1.8)  | 97.7 (6.8)  |
| Big South Fork National River and Recreation Area   | 76 (29.9)   | 4.5 (5.4)   | 23.1 (25.2) | 20.8 (40.3) | 45.2 (21)   | 90.7 (21.4) |
| Big Thicket National Preserve                       | 100 (0)     | 92.4 (22.9) | 68 (52)     | 70.7 (17.9) | 70.5 (43.8) | 47.6 (11.5) |
| Bighorn Canyon National Recreation Area             | 97.6 (5.4)  | 28.9 (41.9) | 69.8 (3.5)  | 11.3 (14.8) | 96.7 (8.7)  | 98.7 (3.9)  |
| Biscayne National Park                              | 97.9 (1.7)  | 13.2 (29)   | 14.9 (17.9) | 77.9 (26.2) | 97.9 (2)    | 86 (30.1)   |
| Black Canyon Of The Gunnison National Park          | 91.7 (11.3) | 100 (0)     | 94.7 (14.6) | 33.5 (56.4) | 99.7 (1)    | 74.4 (41.8) |
| Blue Ridge Parkway                                  | 86.8 (20.4) | 4.8 (5.4)   | 10 (8.6)    | 36.8 (52.7) | 53.3 (16.9) | 85.5 (35)   |
| Bluestone National Scenic River                     | 98.2 (4.3)  | 3.4 (4.6)   | 2.6 (1.7)   | 65.4 (34.1) | 73.1 (18.9) | 67.7 (28.8) |
| Booker T. Washington National Monument              | 99.6 (1.1)  | 5.1 (6.3)   | 5.7 (7.9)   | 18 (36.7)   | 44.4 (15.8) | 95.3 (8.7)  |
| Boston Harbor Islands National Recreation Area      | 100 (0)     | 1.8 (1.4)   | 19.5 (34.9) | 29 (51.2)   | 100 (0)     | 93.5 (19.4) |

| Park                                               | Bio1        | Bio2        | Bio3        | Bio4        | Bio5        | Bio6        |
|----------------------------------------------------|-------------|-------------|-------------|-------------|-------------|-------------|
| Bryce Canyon National Park                         | 98.4 (4.9)  | 52 (26.9)   | 85.8 (37.9) | 31.7 (33.2) | 99.7 (1)    | 95.2 (9.7)  |
| Buck Island Reef National Monument                 | 89.2 (17.5) | 52.6 (27.2) | 43.8 (3.4)  | 93.1 (11.8) | 89.2 (17.5) | 93 (14.4)   |
| Buffalo National River                             | 91.9 (16.1) | 7.5 (10.9)  | 10.1 (1.2)  | 22.7 (45.9) | 65.5 (13.8) | 96.7 (7.8)  |
| Cabrillo National Monument                         | 73.2 (9.4)  | 3.7 (7.7)   | 9.5 (7.1)   | 24.3 (17.9) | 53.5 (15.3) | 93.6 (8.6)  |
| Canaveral National Seashore                        | 89 (23.3)   | 94.5 (9.7)  | 86.3 (29.1) | 65 (16)     | 88.3 (20.4) | 49 (36.7)   |
| Canyon De Chelly National Monument                 | 97.4 (7.8)  | 35.8 (41.4) | 63.8 (22.2) | 31 (52.4)   | 100 (0)     | 92.4 (15.5) |
| Canyonlands National Park                          | 91.6 (15.3) | 100 (0)     | 93.5 (19.4) | 38.5 (72.3) | 99 (2.9)    | 86.8 (30.1) |
| Cape Cod National Seashore                         | 100 (0)     | 80.5 (36.7) | 47.6 (58.9) | 73.2 (28.6) | 100 (0)     | 93 (16.4)   |
| Cape Hatteras National Seashore                    | 97.3 (4.9)  | 3.3 (6.7)   | 7.3 (15.8)  | 67.3 (41.6) | 90.1 (16.1) | 83.2 (40.8) |
| Cape Krusenstern National Monument                 | 94.2 (9.6)  | 12.1 (4.3)  | 3.6 (3.4)   | 36 (64.4)   | 90.4 (8.4)  | 81.2 (16.1) |
| Cape Lookout National Seashore                     | 97.6 (4.3)  | 1.7 (1.8)   | 9.9 (17.6)  | 44.4 (51.1) | 88.3 (21.5) | 82.8 (39.8) |
| Capitol Hill Parks                                 | 98.6 (4.3)  | 5.6 (7.6)   | 23.2 (27.4) | 38.9 (45.3) | 80.7 (21.7) | 83.1 (17.5) |
| Capitol Reef National Park                         | 97.4 (7.8)  | 83.5 (14.6) | 85.6 (35.9) | 37.8 (54.7) | 99 (2.9)    | 92.4 (15.5) |
| Capulin Volcano National Monument                  | 100 (0)     | 41.7 (57.4) | 54.8 (49.3) | 36.9 (57.8) | 100 (0)     | 92.9 (11.2) |
| Carl Sandburg Home National Historic Site          | 65.6 (9.7)  | 9.6 (10.9)  | 16.7 (8.8)  | 46.6 (41)   | 56.8 (8.5)  | 75.6 (29.7) |
| Carlsbad Caverns National Park                     | 100 (0)     | 5.6 (5.5)   | 28.6 (10.2) | 41.7 (37.2) | 96.3 (8.7)  | 96.8 (1.7)  |
| Casa Grande Ruins National Monument                | 100 (0)     | 4.1 (4.4)   | 3.8 (3.4)   | 89.6 (1.1)  | 99.7 (1)    | 98 (4.8)    |
| Castillo De San Marcos National Monument           | 87.9 (22.3) | 98.4 (4.8)  | 66 (21.3)   | 67.4 (18.4) | 90.1 (17.2) | 56.9 (67.3) |
| Catoctin Mountain Park                             | 75.6 (29.6) | 5 (10.6)    | 32.5 (25.9) | 25.7 (43)   | 49.4 (15.6) | 65.6 (13.3) |
| Cedar Breaks National Monument                     | 99 (2.9)    | 22.8 (16.8) | 66.7 (61)   | 51.5 (50.6) | 99.7 (1)    | 96.7 (8.7)  |
| Chaco Culture National Historical Park             | 98.7 (3.9)  | 8.9 (13.2)  | 51.2 (31)   | 17.4 (34.7) | 100 (0)     | 95.3 (11.7) |
| Channel Islands National Park                      | 81.7 (17.2) | 1.1 (0.2)   | 32.8 (13.5) | 1.7 (1.8)   | 18.6 (4.3)  | 99.6 (1.2)  |
| Charles Pinckney National Historic Site            | 89.3 (9.6)  | 39.5 (58.6) | 30 (7.3)    | 60.9 (32.1) | 96.9 (5.4)  | 58.2 (23.8) |
| Chattahoochee River National Recreation Area       | 100 (0)     | 9.7 (8.3)   | 22.7 (23.5) | 21.8 (41)   | 96.7 (8.7)  | 80 (23.4)   |
| Chesapeake and Ohio Canal National Historical Park | 77.1 (28)   | 1.4 (1.2)   | 11.8 (18.8) | 21.7 (44.4) | 38.2 (21.2) | 78.3 (24.1) |
| Chickamauga and Chattanooga National Military Park | 87.1 (29.4) | 4.5 (5.4)   | 30.5 (41.4) | 44.7 (31.8) | 73.2 (18.7) | 67.9 (21.4) |
| Chickasaw National Recreation Area                 | 95.2 (14.5) | 55.8 (35.9) | 83.9 (2.7)  | 23.6 (30.9) | 76.8 (24.4) | 88.8 (27.7) |
| Chiricahua National Monument                       | 100 (0)     | 2.5 (2.5)   | 2.1 (2.8)   | 91.6 (10.4) | 100 (0)     | 98.8 (2.4)  |
| City Of Rocks National Reserve                     | 92 (16.5)   | 38.7 (19.2) | 68.6 (34)   | 36.9 (43.5) | 71.6 (32.2) | 96.4 (10.7) |
| Colonial National Historical Park                  | 100 (0)     | 3.7 (6.6)   | 14.2 (14.9) | 37.5 (53.7) | 97.6 (4.3)  | 92.5 (19.4) |
| Colorado National Monument                         | 85.9 (17)   | 100 (0)     | 96.1 (11.7) | 38.2 (64.9) | 99 (2.9)    | 71.1 (61.9) |
| Congaree National Park                             | 59.1 (13.2) | 32.1 (34.1) | 36.5 (4.4)  | 55.6 (20.5) | 44.4 (19.5) | 51.3 (22.6) |
| Coronado National Memorial                         | 100 (0)     | 20.7 (28.9) | 20.8 (30.3) | 74.5 (21.1) | 99.4 (1.9)  | 100 (0)     |
| Cowpens National Battlefield                       | 86 (9.6)    | 52.7 (20.5) | 62.2 (7.3)  | 19.8 (38.1) | 62.6 (10.5) | 78.9 (40.6) |
| Crater Lake National Park                          | 95.6 (6.8)  | 1.1 (0.2)   | 1.1 (0.2)   | 43.6 (35.1) | 34 (53.9)   | 96.7 (8.7)  |
| Craters Of The Moon National Monument and Preserve | 93.1 (8.3)  | 47.1 (12.2) | 93.5 (19.4) | 29.3 (41.5) | 70.7 (28.6) | 97.3 (6.8)  |
| Cumberland Gap National Historical Park            | 77.8 (26.5) | 4.1 (6.6)   | 8.6 (9.6)   | 45.8 (35.2) | 40.7 (23.7) | 85.9 (16.1) |
| Cumberland Island National Seashore                | 91.3 (16.5) | 99.6 (1.1)  | 78.8 (37.4) | 71.7 (18.9) | 89.1 (16.5) | 46.2 (58)   |
| Curecanti National Recreation Area                 | 92.7 (6.8)  | 100 (0)     | 92.6 (18.4) | 29 (41.3)   | 99.7 (1)    | 78.7 (38.1) |
| Cuyahoga Valley National Park                      | 99 (2.9)    | 29.9 (17.1) | 56.5 (27.4) | 20.6 (44.4) | 55 (5.4)    | 69.6 (40.8) |

| <b>Park</b>                                            | <b>Bio1</b> | <b>Bio2</b> | <b>Bio3</b> | <b>Bio4</b> | <b>Bio5</b> | <b>Bio6</b> |
|--------------------------------------------------------|-------------|-------------|-------------|-------------|-------------|-------------|
| Death Valley National Park                             | 99.4 (1.9)  | 1.1 (0.2)   | 11 (17.3)   | 32.1 (35.6) | 96.2 (8.6)  | 98.3 (3.9)  |
| Delaware Water Gap National Recreation Area            | 100 (0)     | 15.2 (6.6)  | 35.6 (23.7) | 18.7 (39.6) | 98.4 (4.8)  | 90.4 (22.3) |
| Denali National Park and Preserve                      | 93.7 (6.5)  | 18.7 (20.9) | 22.4 (35.4) | 51.7 (36.7) | 70.1 (34.8) | 91.3 (17)   |
| Devils Postpile National Monument                      | 99 (2.9)    | 1.5 (1.4)   | 2.2 (0.5)   | 87.6 (7.2)  | 95.6 (4.1)  | 96.1 (6.8)  |
| Devils Tower National Monument                         | 82.6 (21.7) | 98 (3.2)    | 94.9 (7.8)  | 17 (26.2)   | 93.4 (7.1)  | 94.4 (9.8)  |
| Dinosaur National Monument                             | 88.2 (30.1) | 63.7 (42.8) | 88.8 (25.2) | 32.6 (61.6) | 91.2 (20.5) | 86.1 (32)   |
| Dry Tortugas National Park                             | 86.4 (19.7) | 1.1 (0.2)   | 12.4 (16.4) | 78 (33)     | 61.2 (10.5) | 78.8 (49.5) |
| Ebey's Landing National Historical Reserve             | 86 (10.2)   | 7.8 (7)     | 23.9 (18.6) | 27 (20.9)   | 93.4 (11.7) | 94.9 (8.5)  |
| Effigy Mounds National Monument                        | 99.4 (1.9)  | 7.5 (10.9)  | 29.8 (17.9) | 12.4 (24)   | 29.5 (47.6) | 96.3 (6.8)  |
| Eisenhower National Historic Site                      | 75.9 (21.1) | 25.1 (20.6) | 43.5 (32.4) | 30.4 (41.1) | 57.1 (16.5) | 60.5 (9.3)  |
| El Malpais National Monument                           | 99.7 (1)    | 5.2 (4.2)   | 32.7 (19.6) | 15 (21.9)   | 68.1 (20.6) | 96.3 (8.7)  |
| El Morro National Monument                             | 99.7 (1)    | 6 (4.4)     | 40.5 (20.4) | 16.9 (27.7) | 90.7 (10.3) | 95.2 (9.7)  |
| Eugene O'Neill National Historic Site                  | 88.1 (8.3)  | 5.8 (9.5)   | 18.1 (11.6) | 44 (10.9)   | 16.2 (23)   | 96.7 (6.7)  |
| Everglades National Park                               | 97.6 (2.7)  | 4 (8.6)     | 18.1 (26.2) | 71.2 (34.4) | 96.4 (1.4)  | 83.4 (36.9) |
| Fire Island National Seashore                          | 100 (0)     | 4.2 (4.6)   | 17.9 (29.9) | 77.8 (40.2) | 100 (0)     | 91.5 (22.3) |
| Florissant Fossil Beds National Monument               | 100 (0)     | 95.9 (8.4)  | 90.7 (24.3) | 30 (26.2)   | 100 (0)     | 93.9 (14.6) |
| Fort Bowie National Historic Site                      | 100 (0)     | 2.5 (2.5)   | 2.1 (2.8)   | 92.4 (12.4) | 99.4 (1.9)  | 98.8 (2.4)  |
| Fort Caroline National Memorial                        | 90.9 (17.5) | 100 (0)     | 67.3 (14)   | 69.2 (17.9) | 89.8 (16.1) | 51.4 (63)   |
| Fort Davis National Historic Site                      | 100 (0)     | 40.9 (3.3)  | 46.8 (21.4) | 66 (26.4)   | 96.7 (6)    | 93.1 (16.3) |
| Fort Donelson National Battlefield                     | 69.8 (32.9) | 7.4 (12.2)  | 17.1 (9.3)  | 18 (37.6)   | 52 (26.1)   | 70.7 (28)   |
| Fort Frederica National Monument                       | 93 (13.6)   | 100 (0)     | 77.9 (43.5) | 72.7 (20.8) | 89.5 (16.5) | 47.9 (57.2) |
| Fort Laramie National Historic Site                    | 98 (3.2)    | 94 (16.1)   | 89.7 (22.3) | 33.5 (15.2) | 98.4 (4.9)  | 97.7 (6.8)  |
| Fort Larned National Historic Site                     | 89.6 (9.6)  | 82.7 (13.2) | 92.8 (0.7)  | 11.6 (16.8) | 62.5 (35.8) | 97.9 (2.8)  |
| Fort Matanzas National Monument                        | 84 (24)     | 95.6 (13.3) | 63.9 (21.1) | 66.7 (18.6) | 89.7 (18.3) | 56.6 (68.3) |
| Fort Moultrie National Monument                        | 91.8 (10.1) | 43.8 (57.9) | 28.8 (2.9)  | 61.3 (29.9) | 96.9 (3.1)  | 57.5 (23.5) |
| Fort Necessity National Battlefield                    | 86.3 (12.2) | 1.7 (1.8)   | 4.6 (9.8)   | 19 (39.6)   | 30.1 (6.7)  | 83.3 (25.5) |
| Fort Point National Historic Site                      | 91.2 (14.3) | 1.7 (1.8)   | 12.7 (3.8)  | 53.9 (11.7) | 56.1 (8.6)  | 97.7 (5.8)  |
| Fort Pulaski National Monument                         | 82.9 (11.7) | 91.1 (12)   | 82.3 (37.2) | 69.3 (25.7) | 92.2 (13.6) | 51 (32.1)   |
| Fort Raleigh National Historic Site                    | 98.6 (2.2)  | 3.7 (7.7)   | 7.5 (11.2)  | 67.7 (41.6) | 93.4 (12.9) | 85.5 (35)   |
| Fort Sumter National Monument                          | 92.2 (7.9)  | 41.6 (60.3) | 26.8 (8)    | 62.3 (30.9) | 96.9 (5.4)  | 59 (25)     |
| Fort Union National Monument                           | 100 (0)     | 5.3 (7.7)   | 64.5 (24)   | 17.4 (20.5) | 94 (18.1)   | 97.3 (6.8)  |
| Fort Union Trading Post National Historic Site         | 85.8 (22.3) | 52.9 (24.1) | 93.9 (9.7)  | 13.2 (21.1) | 76.6 (15.5) | 98.3 (3.2)  |
| Fort Vancouver National Historic Site                  | 82.4 (27.9) | 1.1 (0.2)   | 1.1 (0.2)   | 67.9 (24.6) | 24.7 (34.6) | 93.7 (14.5) |
| Fort Washington Park                                   | 98.2 (5.4)  | 1.4 (1.2)   | 19.9 (25.7) | 39 (43.1)   | 79.8 (20.3) | 85.5 (15.8) |
| Fossil Butte National Monument                         | 98.7 (3.9)  | 8.8 (17.3)  | 30.7 (59.6) | 37.4 (49.2) | 82.9 (26.5) | 97.1 (8.7)  |
| Frederick Douglass National Historic Site              | 98.6 (4.3)  | 4.1 (5.1)   | 23.2 (27.4) | 38.9 (45.3) | 80.3 (22.7) | 83.8 (17.8) |
| Fredericksburg and Spotsylvania National Military Park | 83.4 (26.9) | 1.1 (0.2)   | 7.7 (13.7)  | 47.4 (47.5) | 75.1 (28.7) | 85.3 (20.9) |
| Friendship Hill National Historic Site                 | 93.3 (6.5)  | 3.4 (5.7)   | 8.5 (18.5)  | 24.5 (45.2) | 46.3 (8.3)  | 82.5 (25.5) |
| Gates Of The Arctic National Park and Preserve         | 98 (4.9)    | 31 (5.3)    | 47.2 (21.7) | 43.4 (44.3) | 86.9 (23.3) | 93 (8.4)    |
| Gateway National Recreation Area                       | 100 (0)     | 4.1 (6.6)   | 20.7 (28.4) | 47.7 (59.3) | 100 (0)     | 91.4 (21.4) |

| <b>Park</b>                                        | <b>Bio1</b> | <b>Bio2</b> | <b>Bio3</b> | <b>Bio4</b> | <b>Bio5</b> | <b>Bio6</b> |
|----------------------------------------------------|-------------|-------------|-------------|-------------|-------------|-------------|
| Gauley River National Recreation Area              | 99.3 (2.2)  | 16.5 (2.4)  | 21 (26.7)   | 41.4 (45)   | 76.6 (20.3) | 71.4 (31.2) |
| George Washington Birthplace National Monument     | 95.8 (8.4)  | 1.4 (0.9)   | 12.9 (20.2) | 42.5 (45)   | 87.3 (13.6) | 91.5 (22.3) |
| George Washington Carver National Monument         | 90 (18.5)   | 47.2 (44.1) | 46.2 (21.1) | 19.4 (38.1) | 73.1 (20.8) | 82.9 (11.6) |
| George Washington Memorial Parkway                 | 91.1 (19.4) | 1.4 (1.2)   | 20.4 (27.9) | 36.5 (41.6) | 73.5 (24.3) | 82 (18.3)   |
| Gettysburg National Military Park                  | 81.5 (15.2) | 28.4 (28.1) | 45.2 (31.4) | 29.7 (41.3) | 58.9 (11.2) | 61.9 (7.1)  |
| Gila Cliff Dwellings National Monument             | 100 (0)     | 4.8 (6.3)   | 24.4 (30.3) | 23.4 (16.6) | 86.6 (21)   | 99.7 (1)    |
| Glacier Bay National Park and Preserve             | 88.1 (17.5) | 17.2 (8.1)  | 50.1 (11.1) | 16.1 (30.8) | 36.6 (39.4) | 97.3 (5.8)  |
| Glacier National Park                              | 85.8 (20.2) | 39.4 (11.9) | 99.4 (1.9)  | 3.8 (4.2)   | 42.1 (34.2) | 99.7 (1)    |
| Glen Canyon National Recreation Area               | 97.1 (8.7)  | 99.4 (1.9)  | 90.3 (24.3) | 32.6 (60.2) | 99 (2.9)    | 92.1 (16.5) |
| Golden Gate National Recreation Area               | 88.4 (16.3) | 2.4 (3.8)   | 16.2 (10.9) | 55.9 (9.8)  | 56.7 (7.6)  | 97 (7.8)    |
| Golden Spike National Historic Site                | 92.7 (16.5) | 5.9 (6.5)   | 41.1 (54.6) | 33.5 (58.6) | 92.1 (12.4) | 96.3 (8.7)  |
| Grand Canyon National Park                         | 99 (2.9)    | 7.2 (3.1)   | 34.3 (29.9) | 27.3 (31.4) | 99.7 (1)    | 96.2 (7.8)  |
| Grand Portage National Monument                    | 97.4 (6.8)  | 1.1 (0.2)   | 8.3 (21.9)  | 22.8 (44.9) | 69.7 (6.8)  | 86.2 (34)   |
| Grand Teton National Park                          | 92.5 (10)   | 40.5 (48.9) | 89.9 (19.4) | 17.3 (25.4) | 91.3 (4)    | 95.6 (10.7) |
| Grant-Kohrs Ranch National Historic Site           | 99 (1.9)    | 64 (65.9)   | 83.9 (30.4) | 6.6 (15.3)  | 98.7 (3.9)  | 99 (2.9)    |
| Great Basin National Park                          | 98.4 (4.9)  | 46.7 (13.4) | 61.8 (30.5) | 56.7 (32.6) | 98.7 (3.9)  | 95.7 (6.8)  |
| Great Sand Dunes National Park and Preserve        | 99.4 (1.9)  | 86.7 (20.5) | 89.4 (16.1) | 24 (51.1)   | 100 (0)     | 90.8 (20.4) |
| Great Smoky Mountains National Park                | 59.4 (11.6) | 3.7 (5.6)   | 6.5 (12.3)  | 46.9 (40.5) | 37.8 (14.6) | 88.1 (29.1) |
| Greenbelt Park                                     | 99.6 (1.1)  | 21.1 (27.9) | 28.9 (27.1) | 41.4 (46.2) | 89.6 (14.8) | 81.3 (18.3) |
| Guadalupe Mountains National Park                  | 100 (0)     | 19.3 (19.2) | 21.5 (20.6) | 59.7 (35.9) | 94.8 (10.7) | 98.9 (0.2)  |
| Guilford Courthouse National Military Park         | 100 (0)     | 4.9 (4.4)   | 14.6 (9.5)  | 14.9 (24.5) | 85.8 (16.4) | 95 (9.7)    |
| Gulf Islands National Seashore                     | 73 (22.1)   | 38.2 (9)    | 58.2 (5.1)  | 59.1 (22.2) | 81 (10.3)   | 55.3 (17.1) |
| Hagerman Fossil Beds National Monument             | 99.7 (1)    | 30 (27.8)   | 73.8 (45.8) | 46.3 (37.5) | 81.6 (13.2) | 97.4 (7.8)  |
| Haleakala National Park                            | 81.9 (8.4)  | 8.1 (13.4)  | 12.2 (18.9) | 76.7 (19.3) | 65.4 (6.5)  | 98.8 (3.6)  |
| Harpers Ferry National Historical Park             | 63 (34.9)   | 1.4 (1.2)   | 11.8 (19.7) | 22 (46.1)   | 32.1 (21.4) | 67.5 (18.1) |
| Hawaii Volcanoes National Park                     | 76.5 (3.6)  | 20.9 (33.5) | 18.1 (25.8) | 80.1 (34.8) | 67 (18.6)   | 90.9 (14)   |
| Herbert Hoover National Historic Site              | 98.7 (2.9)  | 7.9 (10.3)  | 32 (10.3)   | 9.7 (18.2)  | 21.3 (26.7) | 94.7 (11.7) |
| Homestead National Monument of America             | 82.5 (9.9)  | 88.6 (22.6) | 97.9 (5.4)  | 4.6 (7.4)   | 10.9 (6.4)  | 86.5 (11.8) |
| Hopewell Culture National Historical Park          | 60.8 (43.3) | 3.1 (4.6)   | 24.8 (31.8) | 19 (39.6)   | 23.4 (16)   | 80.8 (23.1) |
| Hopewell Furnace National Historic Site            | 100 (0)     | 92.3 (17.4) | 80.7 (32.3) | 17.7 (36.7) | 97.7 (5.8)  | 83.7 (25.7) |
| Horseshoe Bend National Military Park              | 62.6 (24.9) | 33 (19.1)   | 16.7 (20.9) | 31.6 (48.3) | 55 (26.3)   | 61.5 (9.3)  |
| Hot Springs National Park                          | 85.2 (34)   | 5.1 (6.3)   | 5.3 (7.7)   | 28.6 (42.1) | 59 (14.7)   | 99.4 (1.9)  |
| Hovenweep National Monument                        | 97.4 (7.8)  | 100 (0)     | 93.2 (20.4) | 40.5 (61.5) | 99.7 (1)    | 80.7 (32.6) |
| Hubbell Trading Post National Historic Site        | 98.1 (5.8)  | 24.6 (24.8) | 50.9 (34)   | 30.5 (43.2) | 100 (0)     | 92.1 (14.5) |
| Indiana Dunes National Lakeshore                   | 82.4 (17.4) | 3.1 (2.7)   | 3.9 (2.7)   | 18.3 (40.5) | 15.2 (11.7) | 83.3 (34.7) |
| Isle Royale National Park                          | 97.4 (6.8)  | 1.1 (0.2)   | 3.5 (7.5)   | 29.4 (60.2) | 71.6 (16.6) | 84.3 (41.7) |
| Jean Lafitte National Historical Park and Preserve | 100 (0)     | 3.4 (5.6)   | 10.6 (13.3) | 74 (16.5)   | 99 (1.9)    | 92.2 (17.3) |
| Jewel Cave National Monument                       | 68.6 (26.7) | 98.7 (2.9)  | 86 (28.4)   | 60 (25.6)   | 93 (8.4)    | 67.1 (18.1) |
| John Day Fossil Beds National Monument             | 87.4 (27.2) | 16.1 (17.7) | 58.7 (33.5) | 13.7 (29.8) | 84 (15.9)   | 95.4 (12.6) |
| John Muir National Historic Site                   | 90 (10.7)   | 3.1 (4.7)   | 24.5 (20.1) | 46.8 (13.2) | 7 (16.4)    | 97 (7.8)    |

| <b>Park</b>                                              | <b>Bio1</b> | <b>Bio2</b> | <b>Bio3</b> | <b>Bio4</b> | <b>Bio5</b> | <b>Bio6</b> |
|----------------------------------------------------------|-------------|-------------|-------------|-------------|-------------|-------------|
| Johnstown Flood National Memorial                        | 67.1 (17.4) | 1.1 (0.2)   | 11.9 (23.4) | 16.8 (31.8) | 34.9 (16.6) | 86.3 (19)   |
| Joshua Tree National Park                                | 100 (0)     | 2.7 (4.7)   | 4 (3.9)     | 9.2 (15.2)  | 54.2 (57.2) | 99.4 (1.9)  |
| Kalaupapa National Historical Park                       | 88.1 (7.4)  | 5.1 (12.3)  | 12.3 (8.9)  | 73.8 (19.6) | 70.1 (7)    | 100 (0)     |
| Kaloko-Honokohau National Historical Park                | 81.1 (6.9)  | 3.9 (8.7)   | 13.4 (24.8) | 81.9 (23.8) | 69.7 (15)   | 98.5 (2.4)  |
| Katmai National Park and Preserve                        | 80.1 (25.3) | 61 (12.5)   | 43.6 (20.5) | 49.1 (40.3) | 77.5 (31.9) | 42.5 (36.5) |
| Kenai Fjords National Park                               | 77.5 (22.2) | 2.2 (3.3)   | 1.5 (1.4)   | 20.2 (25)   | 8.6 (12.8)  | 84 (24.8)   |
| Kennesaw Mountain National Battlefield Park              | 100 (0)     | 12.2 (11)   | 21 (17.3)   | 19 (39.3)   | 98.7 (3.9)  | 75.2 (19.3) |
| Kings Mountain National Military Park                    | 71.2 (6.5)  | 71.3 (30.3) | 73.9 (18.9) | 19.1 (38.1) | 62.5 (5.3)  | 63.3 (36.1) |
| Klondike Gold Rush National Historical Park              | 88.5 (18.7) | 17.5 (20.4) | 47.2 (22.3) | 13.8 (26)   | 18.5 (32.5) | 93.6 (10.7) |
| Knife River Indian Villages National Historic Site       | 95.2 (8.6)  | 11.5 (24.1) | 86.9 (22.5) | 10 (13.8)   | 71.9 (21.4) | 99.4 (1.9)  |
| Kobuk Valley National Park                               | 97.2 (4.9)  | 10.4 (10.5) | 7.4 (3.9)   | 29.4 (51.3) | 95.2 (8.6)  | 92.6 (9.5)  |
| Lake Clark National Park and Preserve                    | 86.9 (13.9) | 5.4 (4)     | 4.7 (1.5)   | 30.8 (41.6) | 27.9 (4.8)  | 81.7 (30.6) |
| Lake Mead National Recreation Area                       | 99.7 (1)    | 3.2 (1.5)   | 5.1 (2.1)   | 41.1 (43.6) | 99.7 (1)    | 99.4 (1.9)  |
| Lake Meredith National Recreation Area                   | 93.6 (19.3) | 70 (10.3)   | 90.8 (12.9) | 10.4 (10.7) | 73.3 (16)   | 97.1 (8.7)  |
| Lake Roosevelt National Recreation Area                  | 95.2 (8.6)  | 1.1 (0.2)   | 71.6 (63.6) | 15.1 (28.6) | 74.4 (23)   | 96.8 (9.7)  |
| Lassen Volcanic National Park                            | 97.6 (3.9)  | 2.2 (2.5)   | 2.2 (0.5)   | 67.4 (39.2) | 59.7 (53.4) | 97.7 (5.8)  |
| Lava Beds National Monument                              | 96.3 (7.8)  | 1.5 (1.4)   | 1.5 (1.4)   | 68.3 (38.8) | 54.9 (47.1) | 95.6 (8.6)  |
| Lewis and Clark National Historical Park                 | 79.3 (23.6) | 13.2 (9.3)  | 61.7 (32.7) | 24 (50)     | 43.5 (44.6) | 95.7 (9.6)  |
| Lincoln Boyhood National Memorial                        | 100 (0)     | 4.4 (6.6)   | 2.5 (2.5)   | 14.7 (30.8) | 36.6 (16.4) | 94.5 (15.5) |
| Little Bighorn Battlefield National Monument             | 95.8 (8.6)  | 61 (21.4)   | 79.8 (8)    | 13 (16.5)   | 95.4 (11.7) | 99 (2.9)    |
| Little River Canyon National Preserve                    | 67 (32)     | 5 (9.5)     | 15.2 (14.4) | 25.6 (45.9) | 46.5 (4.5)  | 62.2 (12.5) |
| Lyndon B. Johnson National Historical Park               | 72.9 (36.3) | 63.1 (29.5) | 70.2 (31.5) | 9.9 (13.9)  | 49.1 (8.8)  | 79.5 (35.5) |
| Mammoth Cave National Park                               | 94 (18.1)   | 5.6 (5.5)   | 9.8 (3.4)   | 23.1 (45.2) | 48 (11.3)   | 86.3 (26.5) |
| Manassas National Battlefield Park                       | 69.3 (44.2) | 1.4 (1.2)   | 11.9 (20.9) | 27.1 (43.3) | 53.5 (25.4) | 72.9 (17.5) |
| Manzanar National Historic Site                          | 97.2 (3.1)  | 1.5 (1.4)   | 18.8 (13.9) | 23.6 (32.6) | 87.9 (28.9) | 96.8 (3.8)  |
| Marsh-Billings-Rockefeller National Historical Park      | 100 (0)     | 14.6 (19)   | 71.3 (38.2) | 12.2 (29.9) | 99.7 (1)    | 97.7 (6.8)  |
| Mary McLeod Bethune Council House National Historic Site | 97.8 (6.5)  | 4.4 (6.6)   | 23.2 (27.4) | 39 (43.1)   | 80 (22.7)   | 82.7 (16.3) |
| Mesa Verde National Park                                 | 97.4 (7.8)  | 94.1 (13.3) | 83.5 (17.7) | 38.4 (57)   | 99.7 (1)    | 88.1 (22)   |
| Minute Man National Historical Park                      | 100 (0)     | 1.7 (1.8)   | 32.3 (42.1) | 18.1 (35.7) | 99.7 (1)    | 94.5 (16.5) |
| Mississippi National River and Recreation Area           | 99.7 (1)    | 2.4 (2)     | 16 (25.5)   | 12.1 (22.1) | 72.8 (30.1) | 98.3 (2.9)  |
| Missouri National Recreational River                     | 96.6 (6.5)  | 6.2 (8.4)   | 58 (27.3)   | 10.7 (11.9) | 21 (23.1)   | 98.4 (4.9)  |
| Mojave National Preserve                                 | 100 (0)     | 1.1 (0.2)   | 1.8 (0.9)   | 29.4 (30.5) | 93.4 (13.5) | 100 (0)     |
| Monocacy National Battlefield                            | 65.6 (48.6) | 2.6 (3.8)   | 25.5 (31.8) | 25.6 (46.1) | 41.7 (28.2) | 64.4 (14.1) |
| Montezuma Castle National Monument                       | 99.4 (1.9)  | 21.4 (6)    | 46.8 (27)   | 38 (50.4)   | 98.9 (2.4)  | 96.5 (6.8)  |
| Moores Creek National Battlefield                        | 80.9 (19.2) | 4.1 (5.6)   | 11.2 (7.3)  | 63.1 (30.7) | 82.5 (10.4) | 70.2 (17.9) |
| Morristown National Historical Park                      | 100 (0)     | 23.7 (8.8)  | 30.1 (19.1) | 18.6 (40.5) | 100 (0)     | 91.1 (22.3) |
| Mount Rainier National Park                              | 88.5 (20.4) | 2.1 (2.8)   | 19.8 (48.7) | 36.7 (37.3) | 35.3 (52.2) | 94.7 (14.6) |
| Mount Rushmore National Memorial                         | 67.7 (29.1) | 99 (2.9)    | 80.6 (19.1) | 59.8 (30.9) | 90.8 (5.2)  | 80.3 (15.9) |
| Muir Woods National Monument                             | 89.1 (16.3) | 1.7 (1.8)   | 17.7 (13.1) | 56.3 (10.8) | 57.2 (10)   | 97.3 (6.8)  |
| Natchez Trace Parkway                                    | 64 (24.2)   | 4.8 (6.3)   | 11.1 (6.1)  | 56.2 (22.6) | 55 (25.1)   | 66.3 (13.8) |

| Park                                           | Bio1        | Bio2        | Bio3        | Bio4        | Bio5        | Bio6        |
|------------------------------------------------|-------------|-------------|-------------|-------------|-------------|-------------|
| National Capital Parks-East                    | 97.8 (6.5)  | 5.6 (7.6)   | 23.6 (28.6) | 38.6 (44.3) | 80.3 (22.7) | 82.7 (16.3) |
| National Park of American Samoa                | 96.8 (9.7)  | 3.6 (7.6)   | 4.9 (5.6)   | 97.5 (2.5)  | 96.4 (9.7)  | 96.8 (9.7)  |
| Natural Bridges National Monument              | 96.8 (9.7)  | 99.7 (1)    | 94.5 (16.5) | 38.5 (64.7) | 99 (2.9)    | 87.9 (29.1) |
| Navajo National Monument                       | 97.4 (7.8)  | 86 (12)     | 87.1 (29.6) | 33.1 (46.9) | 99.7 (1)    | 91.7 (16.5) |
| New River Gorge National River                 | 98.9 (3.2)  | 5 (9.5)     | 4.1 (3.1)   | 53.8 (37.8) | 73.8 (19.8) | 68.4 (28.8) |
| Nez Perce National Historical Park             | 96.5 (7.5)  | 5.3 (11)    | 48.7 (51.1) | 23.6 (33.8) | 74.3 (16.5) | 96.7 (8.7)  |
| Ninety Six National Historic Site              | 86 (19.5)   | 14.8 (25.6) | 7.4 (8.8)   | 57.7 (25.6) | 82.8 (39.8) | 57.5 (17.9) |
| Niobrara National Scenic River                 | 94.9 (8.6)  | 5.1 (7.3)   | 40.5 (19)   | 13.7 (18.7) | 40.8 (51.1) | 98.7 (3.9)  |
| Noatak National Preserve                       | 96.4 (6)    | 8.9 (12.2)  | 5 (3.9)     | 29.4 (51.3) | 95.9 (6.5)  | 92.9 (8.5)  |
| North Cascades National Park                   | 90.1 (12.9) | 11.4 (21.3) | 37.1 (3.9)  | 18 (28.7)   | 69.6 (35.8) | 96.4 (9.7)  |
| Obed Wild and Scenic River                     | 82.4 (29.9) | 3.4 (5.7)   | 17.3 (22.6) | 25.6 (45.2) | 45.6 (21.1) | 92.4 (18.4) |
| Ocmulgee National Monument                     | 42.1 (24.9) | 97 (5.4)    | 89.5 (7.6)  | 60.5 (32.6) | 96.4 (8.7)  | 36.6 (22.2) |
| Olympic National Park                          | 86 (11.1)   | 1.1 (0.2)   | 27.3 (17.4) | 13 (27.8)   | 68 (27.6)   | 96.7 (6.7)  |
| Oregon Caves National Monument                 | 81.7 (19.7) | 3.2 (3.8)   | 27 (33.9)   | 69.2 (49.9) | 27.9 (30.6) | 92.8 (12.4) |
| Organ Pipe Cactus National Monument            | 98.7 (3.9)  | 14 (31.7)   | 68 (36.5)   | 26.4 (22.4) | 51.8 (17.5) | 94.6 (1.2)  |
| Ozark National Scenic Riverways                | 94.1 (13.5) | 29.1 (28.8) | 39.8 (19.3) | 31.1 (31.2) | 79.4 (16.1) | 85.9 (21)   |
| Padre Island National Seashore                 | 100 (0)     | 100 (0)     | 99.2 (2.4)  | 25.8 (22.2) | 98.4 (4.9)  | 77.5 (36.8) |
| Palo Alto Battlefield National Historical Park | 100 (0)     | 85 (5)      | 96.8 (9.6)  | 20.5 (15.8) | 82.7 (11.5) | 87.4 (34.9) |
| Pea Ridge National Military Park               | 99.7 (1)    | 8.8 (13.9)  | 24.1 (7.7)  | 21.3 (35.5) | 73.2 (17.7) | 96.7 (6.8)  |
| Pecos National Historical Park                 | 100 (0)     | 6.4 (3.5)   | 45.7 (25.1) | 11.8 (13.9) | 96.2 (6.3)  | 96.7 (8.7)  |
| Petersburg National Battlefield                | 100 (0)     | 3.5 (2.4)   | 6.3 (4.6)   | 35.3 (56.4) | 99.3 (2.2)  | 92.1 (20.4) |
| Petrified Forest National Park                 | 99 (2.9)    | 10.7 (4)    | 56.9 (47.9) | 30.2 (36.5) | 100 (0)     | 93 (11.5)   |
| Petroglyph National Monument                   | 100 (0)     | 3 (5.7)     | 26 (16)     | 13.8 (13.9) | 41.8 (24)   | 97.1 (8.7)  |
| Pictured Rocks National Lakeshore              | 97.6 (3.9)  | 1.1 (0.2)   | 7 (15.8)    | 38.1 (47.9) | 41 (20.4)   | 71.2 (36.5) |
| Pinnacles National Monument                    | 95.7 (5.1)  | 8 (9.3)     | 53.6 (14.4) | 33.6 (16.1) | 23.8 (27.3) | 98.1 (3.6)  |
| Pipe Spring National Monument                  | 99 (2.9)    | 10.6 (10.3) | 63.3 (55.4) | 24.5 (28.7) | 99.7 (1)    | 96.5 (6.8)  |
| Pipestone National Monument                    | 95.4 (9.5)  | 7.1 (12.2)  | 56.3 (24.2) | 8.6 (10.2)  | 21.2 (29.4) | 98 (3.9)    |
| Piscataway Park                                | 97.8 (6.5)  | 1.4 (1.2)   | 18.8 (24.5) | 39.6 (45)   | 79.8 (20.3) | 85.5 (15.8) |
| Point Reyes National Seashore                  | 86.4 (21.1) | 2.4 (3.8)   | 20.3 (20.2) | 58.8 (12.6) | 62.4 (16.2) | 96.3 (7.7)  |
| Port Chicago Naval Magazine National Memorial  | 83.1 (19.7) | 3.8 (5.7)   | 37.2 (25.4) | 42.8 (18.3) | 3.8 (6.7)   | 94.6 (11.5) |
| Presidio of San Francisco                      | 91.2 (14.3) | 1.7 (1.8)   | 12.7 (3.8)  | 53.9 (11.7) | 56.1 (8.6)  | 97.7 (5.8)  |
| Prince William Forest Park                     | 81.2 (32.6) | 1.1 (0.2)   | 11.1 (19.7) | 36.7 (46.9) | 69.2 (28.2) | 83.1 (17.5) |
| Pu'uhonua o Honaunau National Historical Park  | 77.8 (3.2)  | 18 (33)     | 15.1 (27.5) | 80.1 (34.8) | 70.5 (15.9) | 92.2 (16.1) |
| Puukohola Heiau National Historic Site         | 79.4 (5.2)  | 1.1 (0.2)   | 9.8 (16.8)  | 79.7 (23.4) | 70 (14)     | 96.6 (6.5)  |
| Rainbow Bridge National Monument               | 97.4 (7.8)  | 97 (5.7)    | 86.6 (31)   | 32.7 (52)   | 99.4 (1.9)  | 91.7 (16.5) |
| Redwood National Park                          | 43.3 (57.5) | 77.2 (24)   | 61.8 (53)   | 95.7 (10.8) | 69.6 (23.2) | 54.8 (58.9) |
| Richmond National Battlefield Park             | 100 (0)     | 2.4 (2.7)   | 2.6 (1.7)   | 44.3 (42.7) | 97.9 (5.4)  | 93.1 (17.5) |
| Rio Grande Wild and Scenic River               | 99.7 (1)    | 95.7 (10.7) | 91 (10.2)   | 46.3 (23)   | 98.4 (4.9)  | 93.5 (11.4) |
| Rock Creek Park                                | 97.8 (6.5)  | 6.8 (9.9)   | 24 (28.6)   | 38.2 (44.3) | 80 (21.7)   | 82 (17.3)   |
| Rocky Mountain National Park                   | 98.4 (4.9)  | 81.8 (28.6) | 75.4 (24.6) | 32.6 (37.1) | 98.4 (4.9)  | 88.7 (21.2) |

| Park                                                  | Bio1        | Bio2        | Bio3        | Bio4        | Bio5        | Bio6        |
|-------------------------------------------------------|-------------|-------------|-------------|-------------|-------------|-------------|
| Roosevelt-Vanderbilt Headquarters                     | 100 (0)     | 1.1 (0.2)   | 28.4 (31.5) | 38 (30)     | 98.4 (4.9)  | 95.1 (13.6) |
| Russell Cave National Monument                        | 80.9 (32.3) | 6 (12.4)    | 29.9 (34.1) | 34.3 (42.3) | 58.7 (25.3) | 70.2 (22.3) |
| Sagamore Hill National Historic Site                  | 100 (0)     | 15.4 (24.3) | 30.5 (30.2) | 41.6 (59.8) | 100 (0)     | 90.8 (23.3) |
| Saguaro National Park                                 | 100 (0)     | 4.5 (4.3)   | 2.8 (1.7)   | 90.1 (5.1)  | 92.7 (15.1) | 92 (3.9)    |
| Saint Croix National Scenic Riverway                  | 99.7 (1)    | 2.4 (2)     | 13.6 (28.4) | 9.8 (16.3)  | 65.7 (28.6) | 97.3 (5.8)  |
| Saint-Gaudens National Historic Site                  | 100 (0)     | 8.8 (19.4)  | 61.4 (53.2) | 13.5 (32.8) | 97.7 (6.8)  | 97.1 (8.7)  |
| Salinas Pueblo Missions National Monument             | 100 (0)     | 3.8 (6.7)   | 30.4 (36.8) | 8.7 (10)    | 53.5 (44.5) | 97 (7.8)    |
| San Antonio Missions National Historical Park         | 100 (0)     | 56.7 (27)   | 63.8 (40.6) | 30.1 (18.6) | 99.7 (1)    | 98.8 (3.6)  |
| San Juan Island National Historical Park              | 86.8 (12.4) | 12.1 (2.8)  | 49.4 (34)   | 17.3 (15.6) | 98.6 (3.2)  | 95.7 (9.6)  |
| Sand Creek Massacre National Historic Site            | 100 (0)     | 59.6 (37.4) | 86.4 (10.7) | 17 (25)     | 88.5 (10.3) | 92.6 (13.1) |
| Santa Monica Mountains National Recreation Area       | 34.4 (41.7) | 1.1 (0.2)   | 34.2 (34.1) | 1.7 (1.8)   | 3.2 (3.8)   | 99.2 (2.4)  |
| Saratoga National Historical Park                     | 100 (0)     | 1.1 (0.2)   | 20.2 (33.5) | 15 (32.8)   | 56.3 (15.9) | 98.4 (4.9)  |
| Saugus Iron Works National Historic Site              | 100 (0)     | 1.1 (0.2)   | 21 (35.1)   | 22.1 (44.4) | 99.7 (1)    | 93.5 (19.4) |
| Scotts Bluff National Monument                        | 99.4 (1.9)  | 67.5 (31.9) | 75.3 (21.5) | 24 (31.6)   | 98.7 (3.9)  | 97.4 (7.8)  |
| Sequoia and Kings Canyon National Parks               | 97.9 (4.3)  | 1.5 (1.4)   | 10.5 (15.2) | 27.1 (35.1) | 40 (53.1)   | 96.5 (4.7)  |
| Shenandoah National Park                              | 79.2 (29.4) | 4.4 (6.6)   | 8.4 (15.2)  | 20.8 (39.1) | 38 (12.1)   | 84.5 (18.8) |
| Shiloh National Military Park                         | 78.5 (28.9) | 5.1 (7.3)   | 10.4 (3.4)  | 48.6 (23.1) | 60.9 (16.1) | 88 (15.9)   |
| Sitka National Historical Park                        | 81.3 (27.7) | 4.5 (3.4)   | 55.5 (28.9) | 19.3 (41.5) | 53.8 (19.9) | 95 (10.7)   |
| Sleeping Bear Dunes National Lakeshore                | 97.3 (6)    | 5.1 (8.5)   | 25.3 (20.1) | 14.8 (26)   | 28.9 (33.9) | 83.7 (24.3) |
| Stones River National Battlefield                     | 70.1 (32.9) | 5.9 (6.1)   | 18.5 (15.8) | 33.8 (37.7) | 49.3 (19.6) | 54.3 (9.6)  |
| Sunset Crater Volcano National Monument               | 99 (2.9)    | 57.4 (19)   | 87.4 (23)   | 29.8 (27.6) | 96.5 (9.6)  | 93.1 (13.6) |
| Tallgrass Prairie National Preserve                   | 99.7 (1)    | 36.3 (27.5) | 86.6 (15.6) | 10.5 (16)   | 65.7 (17.2) | 97 (5.8)    |
| Theodore Roosevelt National Park                      | 84.9 (20.2) | 72.8 (40.9) | 94.5 (10.8) | 13.2 (22.1) | 81.5 (29.7) | 99.7 (1)    |
| Thomas Stone National Historic Site                   | 96.6 (6.5)  | 1.4 (1.2)   | 16.7 (26.2) | 40.7 (44.1) | 83.3 (18.3) | 86.7 (19.8) |
| Timpanogos Cave National Monument                     | 97.1 (8.7)  | 2.9 (2.8)   | 3.5 (1.9)   | 83.9 (34.3) | 97.7 (4.9)  | 96 (9.7)    |
| Timucuan Ecological and Historic Preserve             | 90.9 (17.5) | 99.6 (1.1)  | 73.8 (18.8) | 69.7 (16.7) | 89.4 (17.2) | 49.1 (59.2) |
| Tonto National Monument                               | 99.4 (1.9)  | 8.3 (10.3)  | 39.9 (31.9) | 38.8 (28.3) | 99.6 (1.2)  | 96.5 (4.7)  |
| Tumacacori National Historical Park                   | 100 (0)     | 1.4 (0.9)   | 13.2 (19)   | 67.4 (21.1) | 92.4 (15.1) | 100 (0)     |
| Tuzigoot National Monument                            | 99.4 (1.9)  | 16.8 (5.4)  | 49.6 (32.5) | 33.7 (39.7) | 99.7 (1)    | 96.9 (6.8)  |
| Upper Delaware National Scenic and Recreational River | 100 (0)     | 2.8 (4.2)   | 39.6 (34.3) | 20.8 (39.6) | 94.8 (10.7) | 87.9 (22.1) |
| Valley Forge National Historical Park                 | 100 (0)     | 11.9 (6.9)  | 40.7 (36.2) | 19 (40.5)   | 99.3 (1.1)  | 91.8 (20.4) |
| Valor in the Pacific National Monument                | 96.2 (7.5)  | 1.1 (0.2)   | 8.6 (11.2)  | 83.9 (19.8) | 85.5 (25.3) | 97 (7.8)    |
| Vicksburg National Military Park                      | 74.2 (30.3) | 6.3 (13.4)  | 12.3 (15.1) | 56.4 (27)   | 58.1 (38.4) | 86.7 (25.7) |
| Virgin Islands National Park                          | 89.2 (17.5) | 51.5 (23.1) | 47.6 (12)   | 93.8 (10.8) | 89.5 (16.5) | 91.3 (17.2) |
| Voyageurs National Park                               | 99.4 (1.9)  | 36 (24.2)   | 77.6 (11.1) | 3.7 (6.6)   | 52.3 (29.7) | 93 (15.5)   |
| Walnut Canyon National Monument                       | 99 (2.9)    | 54.5 (19.5) | 79.8 (26.3) | 31.7 (34.6) | 94.5 (15.7) | 93.4 (12.6) |
| War In The Pacific National Historical Park           | 94.5 (8.6)  | 85.1 (16.7) | 58.2 (4.9)  | 35.8 (28.5) | 83.8 (22.3) | 69.9 (44.9) |
| Washita Battlefield National Historic Site            | 76.7 (39.5) | 69.8 (51.7) | 94.8 (10.8) | 10.9 (14.8) | 48.9 (36.1) | 89.5 (21.7) |
| Weir Farm National Historic Site                      | 100 (0)     | 49.4 (21.1) | 45.5 (19.5) | 23.8 (45.4) | 100 (0)     | 91.8 (22.3) |
| Whiskeytown National Recreation Area                  | 66.8 (36.6) | 2.9 (2.8)   | 29.5 (33.1) | 45.8 (58.5) | 14.7 (31)   | 93.1 (16.3) |

| <b>Park</b>                                     | <b>Bio1</b> | <b>Bio2</b> | <b>Bio3</b> | <b>Bio4</b> | <b>Bio5</b> | <b>Bio6</b> |
|-------------------------------------------------|-------------|-------------|-------------|-------------|-------------|-------------|
| White Sands National Monument                   | 100 (0)     | 10.9 (26.6) | 28.2 (27.4) | 27.2 (16.3) | 54.9 (39.5) | 99.7 (1)    |
| Whitman Mission National Historic Site          | 84.5 (28.4) | 22 (28.9)   | 72.6 (38.5) | 21.5 (19.6) | 98.3 (2.9)  | 94.1 (16.5) |
| Wilson's Creek National Battlefield             | 95.2 (4.3)  | 17.2 (19)   | 29.7 (8.7)  | 26.4 (42.1) | 69.2 (19.1) | 87.8 (20.7) |
| Wind Cave National Park                         | 79.6 (26)   | 98.7 (2.9)  | 75.9 (17.9) | 59.2 (29.7) | 90.4 (4.1)  | 82.2 (19)   |
| Wolf Trap National Park for the Performing Arts | 79.5 (41.2) | 1.4 (1.2)   | 18.2 (27.7) | 32.8 (44.5) | 64.1 (18.2) | 78.8 (17.3) |
| Wrangell - St Elias National Park and Preserve  | 86.2 (15.8) | 6 (2.9)     | 59.9 (30.8) | 26.2 (37.9) | 40.3 (41.1) | 94.6 (9.7)  |
| Wright Brothers National Memorial               | 98.6 (2.2)  | 3.7 (7.7)   | 8.1 (6.7)   | 68.6 (37)   | 93.4 (12.9) | 85.5 (35)   |
| Wupatki National Monument                       | 99 (2.9)    | 59.6 (17.6) | 81.8 (21.2) | 32.8 (35.3) | 99.3 (1.2)  | 92.7 (12.5) |
| Yellowstone National Park                       | 97.5 (3.1)  | 33.6 (13.8) | 87.6 (32.8) | 12.2 (13.9) | 97.6 (2.7)  | 96.7 (8.7)  |
| Yosemite National Park                          | 99.4 (1.9)  | 1.5 (1.4)   | 1.5 (1.4)   | 97.3 (3.6)  | 99.7 (1)    | 98.6 (2.9)  |
| Yucca House National Monument                   | 97.4 (7.8)  | 100 (0)     | 89.8 (24.3) | 39.9 (50.7) | 99.7 (1)    | 85.8 (28.8) |
| Yukon-Charley Rivers National Preserve          | 94.4 (7.6)  | 14.8 (10.9) | 65.5 (17.2) | 24.1 (37.9) | 35.9 (42.8) | 92.6 (14.3) |
| Zion National Park                              | 99 (2.9)    | 15.6 (16.6) | 57.1 (51.9) | 37.6 (42.5) | 99.7 (1)    | 97 (7.8)    |
