# Supplementary material for: Climate Exposure of US National Parks in a New Era of Change
Source: PubMed Central journal article supplement (PMC4079655; doi:10.1371/journal.pone.0101302), 2014-07-02
Supplement: pone.0101302.s005.pdf [file pone.0101302.s005.pdf]

Appendix S5. Mean percentile and maximum difference in percentile (in parentheses) for moving window standard deviations: annual mean temperature (Bio1), mean diurnal range (Bio2), isothermality (Bio3), temperature seasonality (Bio4), maximum temperature of the warmest month (Bio5), and minimum temperature of the coldest month (Bio6).

| Park                                                | Bio1        | Bio2        | Bio3        | Bio4        | Bio5        | Bio6        |
|-----------------------------------------------------|-------------|-------------|-------------|-------------|-------------|-------------|
| Abraham Lincoln Birthplace National Historical Park | 79.6 (15.1) | 56.1 (23.1) | 18.3 (35.2) | 71 (35.2)   | 93.8 (12.3) | 11.1 (10.2) |
| Acadia National Park                                | 99.6 (1.1)  | 5.7 (14.1)  | 4.4 (8.5)   | 27.5 (24.1) | 33.6 (30.4) | 80.5 (43.1) |
| Agate Fossil Beds National Monument                 | 84.7 (25.5) | 82.7 (33.6) | 14.6 (18.8) | 23.8 (24)   | 94 (3.9)    | 4.3 (9.6)   |
| Ala Kahakai National Historic Trail                 | 74.6 (19.8) | 79 (33.7)   | 38.4 (30.4) | 69.5 (20.5) | 86.4 (12.8) | 57.7 (70.4) |
| Alagnak Wild River                                  | 71.1 (38.8) | 12.4 (8.4)  | 63.5 (27)   | 44.7 (3.2)  | 99.6 (1.2)  | 80.2 (17.5) |
| Alibates Flint Quarries National Monument           | 70.1 (25.4) | 49.5 (39.3) | 12 (16.5)   | 85.1 (5.2)  | 96.3 (5.8)  | 6 (4.4)     |
| Allegheny Portage Railroad National Historic Site   | 37.5 (11.5) | 28.4 (53.4) | 42.8 (13.9) | 65.9 (18.6) | 91.3 (2.9)  | 34.8 (21.2) |
| American Memorial Park                              | 52.2 (37.1) | 64.7 (31.9) | 59.2 (13.7) | 50 (25.3)   | 64.4 (36.6) | 53.6 (7.3)  |
| Amistad National Recreation Area                    | 94.2 (2.4)  | 85.9 (23.1) | 3.7 (4.4)   | 33.8 (13.1) | 74.6 (38.3) | 8.7 (14.8)  |
| Anacostia Park                                      | 82.4 (28.9) | 58 (48.5)   | 44.6 (13.9) | 68.2 (34.1) | 92 (16.5)   | 18.9 (15.6) |
| Aniakchak National Monument and Preserve            | 79.1 (32.5) | 23.7 (40.9) | 76.2 (23.5) | 66.8 (28.8) | 98.5 (2.4)  | 83.7 (8.8)  |
| Antietam National Battlefield                       | 62.9 (53.8) | 42.4 (73.2) | 50.4 (15.3) | 54.4 (45)   | 47.1 (65.4) | 14.2 (13.7) |
| Apostle Islands National Lakeshore                  | 92.8 (2)    | 22.4 (59.2) | 22.2 (56.8) | 50.7 (48.6) | 85 (34.4)   | 36.3 (19.9) |
| Appalachian National Scenic Trail                   | 90.8 (2.2)  | 9.9 (17.3)  | 16.5 (10.3) | 86.6 (12.7) | 90.2 (16.5) | 55.4 (24.9) |
| Appomattox Court House National Historical Park     | 78.6 (53.2) | 100 (0)     | 21.1 (27.5) | 61 (30.8)   | 99.4 (1.9)  | 21.4 (14.9) |
| Arches National Park                                | 31.1 (32.6) | 30.3 (38.9) | 26 (21)     | 20.8 (29.1) | 77.4 (40.1) | 26 (25.8)   |
| Arkansas Post National Memorial                     | 79.6 (17.2) | 59.2 (26.5) | 9.1 (4)     | 50.2 (60.4) | 70.7 (13.6) | 18.7 (20.9) |
| Assateague Island National Seashore                 | 97.3 (4.3)  | 73.7 (9.8)  | 27.2 (10.3) | 60.6 (46.3) | 99 (2.9)    | 19.8 (15.4) |
| Aztec Ruins National Monument                       | 71.3 (30.3) | 35.5 (66.8) | 11.5 (18.9) | 25 (36.8)   | 54.1 (38.5) | 14 (30.4)   |
| Badlands National Park                              | 83.2 (29.9) | 67.5 (21.5) | 2.1 (2.8)   | 15.1 (21.9) | 84.9 (11.5) | 3.1 (3.6)   |
| Baltimore-Washington National Parkway               | 85.3 (0.6)  | 72.4 (39.4) | 49.9 (22.6) | 70 (37.7)   | 99 (2.9)    | 18.5 (16.6) |
| Bandelier National Monument                         | 46.9 (68.5) | 57.8 (32)   | 44.7 (57.5) | 43.8 (40.8) | 72.7 (17.9) | 21.3 (30.8) |
| Bent's Old Fort National Historic Site              | 55.1 (56)   | 39.6 (26.2) | 12.6 (14.8) | 40.5 (19.8) | 78.7 (23.3) | 13.8 (25.3) |
| Bering Land Bridge National Preserve                | 72 (18)     | 24.4 (7.7)  | 64.7 (28.1) | 42.2 (49.4) | 77.3 (34.4) | 68 (33)     |
| Big Bend National Park                              | 86.9 (24.7) | 94.5 (4.3)  | 4.7 (9.8)   | 30.8 (40.1) | 93.9 (5.8)  | 5.6 (12.4)  |
| Big Cypress National Preserve                       | 45 (47.8)   | 14.2 (29.3) | 30.4 (38.3) | 78.2 (38.6) | 59.8 (25.2) | 68.4 (14.3) |
| Big Hole National Battlefield                       | 49 (6.2)    | 16.3 (15.8) | 30.9 (73.2) | 9.4 (6.1)   | 84.3 (32.1) | 4.9 (7.7)   |
| Big South Fork National River and Recreation Area   | 52.2 (22.6) | 77 (37.2)   | 39.9 (64)   | 61.1 (47.1) | 86.6 (23.5) | 8.4 (5.2)   |
| Big Thicket National Preserve                       | 48.8 (20.4) | 32 (63.1)   | 34.7 (27.8) | 54 (73.9)   | 55.9 (21.8) | 17.2 (26.6) |
| Bighorn Canyon National Recreation Area             | 40.9 (19.2) | 33 (20.6)   | 9 (15.9)    | 20.8 (10.7) | 94.6 (9.7)  | 4.5 (5.4)   |
| Biscayne National Park                              | 64.2 (47)   | 3 (5.7)     | 31.9 (25.1) | 76.4 (37.8) | 31.8 (22.7) | 76.4 (7.1)  |
| Black Canyon Of The Gunnison National Park          | 24.9 (34.8) | 85.6 (37.9) | 40.8 (38.3) | 29.3 (37.1) | 76.4 (42.3) | 46.8 (28.6) |
| Blue Ridge Parkway                                  | 71.1 (24.2) | 71.7 (51.7) | 21.3 (20.4) | 74.2 (30.6) | 95.3 (0.6)  | 24.2 (22.2) |
| Bluestone National Scenic River                     | 51.9 (42.7) | 27.6 (38)   | 25.6 (36.3) | 61.6 (51)   | 94.3 (2.7)  | 20.5 (16.8) |
| Booker T. Washington National Monument              | 64.4 (26.2) | 90.1 (22.6) | 23.7 (23.9) | 68.1 (35.9) | 71.2 (32.9) | 34.1 (32.8) |
| Boston Harbor Islands National Recreation Area      | 81.2 (25)   | 15.4 (38.8) | 11.7 (27)   | 73 (27.7)   | 70.1 (46.6) | 53 (29.9)   |

| <b>Park</b>                                        | <b>Bio1</b> | <b>Bio2</b> | <b>Bio3</b> | <b>Bio4</b> | <b>Bio5</b> | <b>Bio6</b> |
|----------------------------------------------------|-------------|-------------|-------------|-------------|-------------|-------------|
| Bryce Canyon National Park                         | 43.3 (27)   | 71.7 (52.8) | 54.5 (38.1) | 2.8 (1.7)   | 48.6 (87.2) | 18.7 (26.6) |
| Buck Island Reef National Monument                 | 34.1 (25.5) | 22.2 (34.5) | 23.5 (22.1) | 63.8 (33.2) | 11.1 (11.7) | 20 (12.3)   |
| Buffalo National River                             | 80.6 (20.5) | 18 (39.1)   | 20.3 (35.4) | 53.4 (48.7) | 57.8 (46.1) | 16.6 (32.3) |
| Cabrillo National Monument                         | 27 (33.9)   | 46.8 (66.1) | 83.3 (15)   | 80.4 (44.4) | 86.7 (8.8)  | 26.3 (57)   |
| Canaveral National Seashore                        | 30.5 (26.9) | 26 (55.9)   | 40.6 (60.1) | 76.1 (45.8) | 31.3 (21.4) | 54.1 (24.1) |
| Canyon De Chelly National Monument                 | 40 (34.8)   | 64.2 (58.1) | 47.8 (36.2) | 12.6 (12.7) | 63.4 (69.5) | 12 (29)     |
| Canyonlands National Park                          | 26.3 (36.7) | 41.2 (76.7) | 18.6 (22.6) | 14 (20.2)   | 76.1 (44)   | 21.7 (30.1) |
| Cape Cod National Seashore                         | 85.1 (33)   | 66 (46.4)   | 24.8 (20.9) | 37.2 (11.3) | 79.9 (39.8) | 67.4 (49.2) |
| Cape Hatteras National Seashore                    | 64.9 (29.3) | 80.7 (21.2) | 14.3 (25.1) | 54.6 (47.1) | 88.8 (30.1) | 15.1 (29.2) |
| Cape Krusenstern National Monument                 | 64.9 (11)   | 28.7 (18.4) | 65.8 (23.7) | 46.9 (49.8) | 91 (11.5)   | 60.5 (56.3) |
| Cape Lookout National Seashore                     | 59.2 (29.6) | 85.4 (23.6) | 9.9 (20.3)  | 54.9 (48.3) | 80 (29.4)   | 18.8 (31.4) |
| Capitol Hill Parks                                 | 81.4 (30.9) | 57 (49.2)   | 44.6 (13.9) | 67.4 (33.9) | 91.7 (17.5) | 19.2 (14.5) |
| Capitol Reef National Park                         | 47 (3)      | 12.4 (19)   | 12.1 (21.6) | 6.1 (5.8)   | 67.7 (67.8) | 12.1 (23.2) |
| Capulin Volcano National Monument                  | 63.1 (59.3) | 68.1 (4.7)  | 5.1 (7.4)   | 83.1 (20.4) | 97.9 (5.4)  | 20.1 (25.6) |
| Carl Sandburg Home National Historic Site          | 73.4 (20.8) | 36.3 (78.2) | 21.8 (28.1) | 77.5 (26.9) | 92.6 (4.9)  | 17.8 (8.9)  |
| Carlsbad Caverns National Park                     | 57.5 (67.5) | 72.9 (25.4) | 4.3 (1.8)   | 71.2 (44)   | 74.3 (33)   | 17.3 (21)   |
| Casa Grande Ruins National Monument                | 33.4 (71.3) | 68.8 (58.3) | 68.2 (17)   | 8.6 (11.4)  | 44.3 (56.3) | 12.3 (15.8) |
| Castillo De San Marcos National Monument           | 32.2 (46.7) | 75.9 (67.9) | 17.7 (46.4) | 76 (39.7)   | 39.4 (28)   | 59.7 (27.6) |
| Catoctin Mountain Park                             | 59.3 (54.3) | 70.8 (36.2) | 58.1 (21.6) | 56 (37.6)   | 63.9 (42.6) | 13.8 (14.7) |
| Cedar Breaks National Monument                     | 26.9 (25.9) | 93.3 (18.3) | 72.4 (39.9) | 3.5 (1.9)   | 52.6 (77.3) | 8.3 (20.3)  |
| Chaco Culture National Historical Park             | 47.4 (42.2) | 26.2 (37.1) | 12.9 (20.2) | 24.4 (29.6) | 65 (32.9)   | 9.3 (23.2)  |
| Channel Islands National Park                      | 30.4 (57.3) | 42.5 (74.4) | 59.9 (30)   | 37.9 (29.4) | 46.1 (55.9) | 59.5 (30.8) |
| Charles Pinckney National Historic Site            | 35.5 (67.6) | 73.3 (18.5) | 18 (36.6)   | 73.7 (34.9) | 44.1 (18.8) | 41.7 (46.1) |
| Chattahoochee River National Recreation Area       | 77.5 (24.4) | 38.1 (33.8) | 5.8 (8.6)   | 79.6 (28.1) | 87.5 (9.3)  | 15.7 (16)   |
| Chesapeake and Ohio Canal National Historical Park | 61.8 (44.3) | 37.3 (90.1) | 52.1 (34.7) | 55.6 (23.4) | 62.8 (53.2) | 16.9 (14.6) |
| Chickamauga and Chattanooga National Military Park | 79.8 (37.6) | 61 (63.7)   | 18.7 (31.7) | 70.8 (33.7) | 72.3 (32.9) | 9.5 (12.4)  |
| Chickasaw National Recreation Area                 | 91.6 (25.2) | 36.6 (40.5) | 45.2 (11.8) | 33.6 (34.8) | 47.9 (33.7) | 17.5 (19)   |
| Chiricahua National Monument                       | 56.3 (80.6) | 47.3 (71)   | 26.6 (52.5) | 39.7 (12.1) | 59 (76.8)   | 9.3 (8.3)   |
| City Of Rocks National Reserve                     | 65.6 (11.8) | 62.3 (47.2) | 37.9 (15.7) | 25.9 (43.6) | 95.7 (11.7) | 49.3 (21.7) |
| Colonial National Historical Park                  | 66.4 (39.8) | 37.8 (58.7) | 10.9 (21.2) | 62.1 (44.2) | 98.1 (5.8)  | 34.5 (40.8) |
| Colorado National Monument                         | 33.9 (53.5) | 51.4 (62.7) | 44.2 (27)   | 34.3 (56.4) | 75.7 (41)   | 33.1 (21.2) |
| Congaree National Park                             | 58.5 (43.1) | 33.1 (36.1) | 11.3 (26)   | 77.5 (26.4) | 78 (7.2)    | 30 (21.5)   |
| Coronado National Memorial                         | 43.2 (86.4) | 56.1 (16.3) | 11.3 (7.1)  | 21.6 (8.1)  | 38.5 (46.1) | 20.8 (20.2) |
| Cowpens National Battlefield                       | 57.5 (34.4) | 66.2 (42.3) | 22.3 (21)   | 77.5 (26.9) | 88.2 (10.7) | 18.8 (7.8)  |
| Crater Lake National Park                          | 26.9 (36.8) | 29.7 (68.9) | 23.7 (52.9) | 16.4 (21.9) | 31 (44.5)   | 42.9 (27)   |
| Craters Of The Moon National Monument and Preserve | 69.1 (38.9) | 38.1 (51.7) | 49 (45.8)   | 24.3 (36.6) | 91.8 (16.4) | 37.4 (21.4) |
| Cumberland Gap National Historical Park            | 73.2 (41.5) | 72.8 (32.1) | 8.9 (12.4)  | 69.4 (43.8) | 99.6 (1.2)  | 11.7 (12.7) |
| Cumberland Island National Seashore                | 20.9 (43.8) | 71.9 (24.8) | 10.5 (27.1) | 73.6 (37)   | 62.1 (25.7) | 42.7 (47.2) |
| Curecanti National Recreation Area                 | 23.6 (23.8) | 80.3 (40.8) | 29.5 (52.2) | 24.2 (35.1) | 72.7 (38.2) | 32.1 (25.6) |
| Cuyahoga Valley National Park                      | 72.9 (15.5) | 42.4 (38.3) | 50.6 (12)   | 77.1 (14.6) | 96.6 (5.8)  | 50.4 (28.8) |

| <b>Park</b>                                            | <b>Bio1</b> | <b>Bio2</b> | <b>Bio3</b> | <b>Bio4</b> | <b>Bio5</b> | <b>Bio6</b> |
|--------------------------------------------------------|-------------|-------------|-------------|-------------|-------------|-------------|
| Death Valley National Park                             | 39 (32.5)   | 66 (90.3)   | 51.3 (77.6) | 1.7 (1.8)   | 52.2 (66.2) | 64.8 (46.2) |
| Delaware Water Gap National Recreation Area            | 84.6 (10)   | 2.9 (2.8)   | 18.6 (26.5) | 92.6 (12.2) | 94.5 (15.5) | 33.4 (12.2) |
| Denali National Park and Preserve                      | 7.9 (10.4)  | 77 (18.3)   | 61.4 (52.5) | 28.6 (48.7) | 88.8 (32.5) | 23.2 (34.1) |
| Devils Postpile National Monument                      | 41.8 (42.8) | 45 (66.1)   | 56.2 (83.1) | 16.1 (19.7) | 58.4 (42.1) | 68.8 (34.4) |
| Devils Tower National Monument                         | 78.5 (18.7) | 71.3 (38.6) | 8.8 (19.4)  | 17.9 (28.6) | 96.6 (5.8)  | 3.1 (3.6)   |
| Dinosaur National Monument                             | 23.3 (40.1) | 27.4 (53.9) | 24 (16.4)   | 13.2 (17.6) | 75.6 (40.6) | 17.8 (42.5) |
| Dry Tortugas National Park                             | 74.2 (23.8) | 67 (33.8)   | 55.6 (38.7) | 78.4 (31.8) | 86.8 (17.3) | 71.2 (12.8) |
| Ebey's Landing National Historical Reserve             | 34.1 (29.7) | 24.9 (45.7) | 5.9 (14.7)  | 54.4 (46.5) | 35.2 (14)   | 5.4 (10.4)  |
| Effigy Mounds National Monument                        | 64.1 (27.1) | 35.6 (63.2) | 5.8 (13.4)  | 57.7 (42.8) | 87 (9.5)    | 26.1 (18)   |
| Eisenhower National Historic Site                      | 62.8 (42.4) | 80.2 (28.2) | 68.5 (30)   | 59.3 (34.4) | 76.7 (39.1) | 14.8 (17.6) |
| El Malpais National Monument                           | 35 (50.3)   | 64.9 (19.9) | 48.8 (20.2) | 28.7 (19.6) | 71.3 (20.2) | 8 (18.3)    |
| El Morro National Monument                             | 42.8 (64.9) | 69 (19.3)   | 43.8 (17.7) | 20.4 (17.8) | 68.9 (26.1) | 8.4 (19.3)  |
| Eugene O'Neill National Historic Site                  | 15.7 (29.6) | 28.1 (49.8) | 12 (3.5)    | 12.1 (23.2) | 28.5 (24.2) | 40.8 (4.5)  |
| Everglades National Park                               | 55.8 (49.1) | 4.1 (4.4)   | 26 (35.2)   | 78.2 (38.8) | 75.8 (36.2) | 72.7 (12.4) |
| Fire Island National Seashore                          | 95.4 (6.2)  | 51.3 (39.5) | 18.2 (21.2) | 88.7 (14.5) | 94.8 (14.6) | 37.5 (6.1)  |
| Florissant Fossil Beds National Monument               | 53.3 (42.9) | 62.9 (29.9) | 16.2 (19.9) | 35.9 (32.2) | 95.5 (8.6)  | 6.3 (14.5)  |
| Fort Bowie National Historic Site                      | 53.5 (81.6) | 53.2 (73.4) | 34 (68.2)   | 39.7 (12.1) | 54.5 (81.7) | 9.6 (7.2)   |
| Fort Caroline National Memorial                        | 27.5 (54.6) | 79.4 (52.3) | 10.5 (28.1) | 75 (36.8)   | 60 (20.6)   | 50.3 (35.5) |
| Fort Davis National Historic Site                      | 80.1 (34.4) | 80.1 (26)   | 1.5 (1.4)   | 34.2 (45.5) | 96.4 (10.8) | 8.9 (13.2)  |
| Fort Donelson National Battlefield                     | 74.4 (13)   | 28 (38.3)   | 32 (49.4)   | 55.9 (59.2) | 71.3 (28.2) | 8.2 (2.5)   |
| Fort Frederica National Monument                       | 27.2 (52.5) | 87.6 (9)    | 10.3 (24.1) | 73.6 (37)   | 56.1 (29.6) | 43.4 (45)   |
| Fort Laramie National Historic Site                    | 80.6 (30.3) | 38.4 (21.2) | 19.5 (25.5) | 21.6 (24.4) | 94.1 (7.4)  | 6.4 (13.5)  |
| Fort Larned National Historic Site                     | 55.4 (22.9) | 52.8 (52.1) | 23.4 (43.2) | 25.3 (30.8) | 84.7 (26.2) | 4.8 (4.3)   |
| Fort Matanzas National Monument                        | 32.9 (46.7) | 74.5 (69.7) | 25.2 (46.9) | 76 (39.7)   | 30.9 (21.9) | 62.9 (23.2) |
| Fort Moultrie National Monument                        | 35.5 (67.6) | 75.5 (21.8) | 17.6 (36.6) | 73.7 (34.9) | 43.6 (27.9) | 43.2 (47.4) |
| Fort Necessity National Battlefield                    | 33.2 (13.6) | 63.4 (79.1) | 54.3 (62.4) | 67.7 (20.1) | 88.5 (28.2) | 29.1 (2)    |
| Fort Point National Historic Site                      | 18 (23.1)   | 28 (76)     | 7.2 (3.9)   | 21.3 (34.6) | 55.9 (33.3) | 45.1 (16.7) |
| Fort Pulaski National Monument                         | 45.5 (38.2) | 58.1 (48.1) | 9.9 (25.1)  | 72.5 (38.5) | 39.4 (20.1) | 36.2 (44.2) |
| Fort Raleigh National Historic Site                    | 62.4 (38.2) | 75.3 (31.4) | 16.7 (31)   | 55 (55.8)   | 89.8 (28.2) | 16.2 (28.5) |
| Fort Sumter National Monument                          | 35.9 (66.5) | 74.5 (24.8) | 19.2 (36.6) | 73.3 (34.9) | 44 (27.9)   | 42.8 (45)   |
| Fort Union National Monument                           | 58.2 (74.1) | 61.3 (69)   | 27.2 (19.8) | 52.5 (20.3) | 71.5 (18.3) | 12.5 (21.8) |
| Fort Union Trading Post National Historic Site         | 38.6 (23.9) | 82.9 (35.4) | 13.2 (32.7) | 23.5 (16.3) | 91.3 (8)    | 13.3 (9.3)  |
| Fort Vancouver National Historic Site                  | 15.5 (18.6) | 42.4 (93.2) | 16.1 (13.8) | 38.9 (33.5) | 28.9 (16)   | 8.3 (20.3)  |
| Fort Washington Park                                   | 83.3 (33)   | 50.3 (43.9) | 41 (14.4)   | 65.5 (29.1) | 90.7 (20.4) | 20.6 (15.4) |
| Fossil Butte National Monument                         | 88 (24.3)   | 17.2 (44.7) | 16.6 (10.7) | 25.8 (50.6) | 93 (13.6)   | 20.5 (22.5) |
| Frederick Douglass National Historic Site              | 83.1 (28.9) | 53.6 (46.5) | 43.9 (15.9) | 67.4 (33.9) | 91.7 (17.5) | 18.9 (15.6) |
| Fredericksburg and Spotsylvania National Military Park | 78.3 (55.1) | 53.1 (42.4) | 34.1 (41.8) | 63.7 (34.5) | 75.4 (45.8) | 23.7 (9.4)  |
| Friendship Hill National Historic Site                 | 44.1 (1.6)  | 65.3 (72.1) | 56.9 (53.4) | 69.3 (20.1) | 93.7 (15.5) | 34 (9.7)    |
| Gates Of The Arctic National Park and Preserve         | 9.9 (11.2)  | 35.7 (12.8) | 50.5 (40.8) | 40.9 (50)   | 48.8 (58.6) | 51.8 (56.2) |
| Gateway National Recreation Area                       | 97.2 (7.2)  | 7.2 (8)     | 4.1 (4.4)   | 92.4 (11.7) | 96.1 (10.7) | 40.4 (6.7)  |

| <b>Park</b>                                        | <b>Bio1</b> | <b>Bio2</b> | <b>Bio3</b> | <b>Bio4</b> | <b>Bio5</b> | <b>Bio6</b> |
|----------------------------------------------------|-------------|-------------|-------------|-------------|-------------|-------------|
| Gauley River National Recreation Area              | 40 (33.4)   | 26.3 (30.9) | 29.7 (27.7) | 72.1 (34.1) | 99.7 (1)    | 18.9 (13.5) |
| George Washington Birthplace National Monument     | 86 (19.5)   | 50.8 (47.3) | 32.4 (33.8) | 64.8 (41.3) | 99 (2.9)    | 23.4 (17.2) |
| George Washington Carver National Monument         | 95.5 (13.6) | 52.8 (4)    | 31.1 (19.7) | 39.6 (53.9) | 62.6 (54.6) | 7.5 (7.9)   |
| George Washington Memorial Parkway                 | 78.3 (44)   | 55.7 (65.4) | 43.2 (13.9) | 63.3 (27.8) | 88.7 (25.2) | 19.7 (12.4) |
| Gettysburg National Military Park                  | 68.5 (30.2) | 79.2 (30.1) | 67.5 (24.2) | 61.6 (38)   | 83.8 (29.1) | 14.8 (17.6) |
| Gila Cliff Dwellings National Monument             | 51.8 (65.1) | 63.6 (73.4) | 48 (87.9)   | 37.5 (3.9)  | 62.5 (52.6) | 15.3 (23.2) |
| Glacier Bay National Park and Preserve             | 20.6 (45.4) | 37.3 (10.2) | 21.9 (39.6) | 8.6 (20.6)  | 81.3 (29.6) | 3.7 (5.6)   |
| Glacier National Park                              | 21.9 (20.2) | 19.3 (13.5) | 28.9 (66)   | 15.5 (13.2) | 91.6 (7.2)  | 2.1 (2)     |
| Glen Canyon National Recreation Area               | 36.6 (9.7)  | 66.4 (69.6) | 27 (47.4)   | 4.7 (1.5)   | 60.7 (82.8) | 13.8 (26.2) |
| Golden Gate National Recreation Area               | 16.1 (23.5) | 20.5 (54.3) | 3.5 (2.4)   | 26.3 (34.4) | 51.9 (42.6) | 46.3 (26.8) |
| Golden Spike National Historic Site                | 67.7 (37.3) | 35.4 (80.9) | 34.9 (43)   | 30.1 (40.2) | 94.5 (15.5) | 36.9 (30.4) |
| Grand Canyon National Park                         | 51.4 (54.3) | 100 (0)     | 71.5 (46.5) | 2.8 (1.7)   | 52.5 (84.8) | 6.3 (14.5)  |
| Grand Portage National Monument                    | 98.7 (2.9)  | 80 (20.7)   | 33.1 (74.8) | 61 (44)     | 94.6 (8.7)  | 47 (33.9)   |
| Grand Teton National Park                          | 73.2 (19.8) | 11.1 (6.1)  | 48.2 (46)   | 34.8 (50)   | 97.1 (7.8)  | 14.7 (10.6) |
| Grant-Kohrs Ranch National Historic Site           | 71.7 (31.2) | 56.9 (69)   | 30.2 (61.4) | 7.6 (12.3)  | 88.1 (17.5) | 8.2 (4.3)   |
| Great Basin National Park                          | 54.7 (6.3)  | 75.3 (22.2) | 69.4 (15)   | 18.3 (19.9) | 74.4 (28.6) | 36.7 (49.7) |
| Great Sand Dunes National Park and Preserve        | 33.4 (62.3) | 99 (2.9)    | 15.4 (19)   | 47.4 (73.7) | 97.1 (7.8)  | 44.4 (46.2) |
| Great Smoky Mountains National Park                | 62.1 (5.9)  | 71.2 (49.5) | 13.2 (16.2) | 69.2 (40.2) | 96.5 (6.8)  | 11.9 (19.7) |
| Greenbelt Park                                     | 83.1 (9.3)  | 66.4 (42.4) | 46.5 (16.6) | 69.2 (35.3) | 96.9 (4.9)  | 18.5 (16.6) |
| Guadalupe Mountains National Park                  | 62.6 (75.3) | 71.8 (10.4) | 3.3 (3.7)   | 71.9 (42.8) | 77.9 (21)   | 14.5 (17.4) |
| Guilford Courthouse National Military Park         | 76.9 (44.4) | 76.8 (26.7) | 22.9 (14)   | 85.8 (12.7) | 81 (4)      | 32.1 (35.8) |
| Gulf Islands National Seashore                     | 68.3 (22.7) | 43.3 (13.1) | 40.6 (63.4) | 66.2 (53.2) | 94.1 (16.5) | 39 (51.6)   |
| Hagerman Fossil Beds National Monument             | 59.3 (45.5) | 31.8 (57.4) | 30.8 (69.6) | 22.3 (32)   | 78.7 (54.4) | 21.6 (30.4) |
| Haleakala National Park                            | 51 (8)      | 53.4 (28.6) | 38.4 (45.1) | 50.9 (39.8) | 56.6 (11.8) | 25.3 (35.6) |
| Harpers Ferry National Historical Park             | 65.7 (64.4) | 39.1 (81.4) | 45.7 (16.4) | 51.3 (51.2) | 40 (66.7)   | 17.4 (12.5) |
| Hawaii Volcanoes National Park                     | 75.6 (18.9) | 83.4 (28.2) | 42.9 (30.3) | 70.3 (19.4) | 88.1 (12)   | 59.8 (70.3) |
| Herbert Hoover National Historic Site              | 71.8 (22.9) | 77.4 (24.6) | 2.5 (2.5)   | 60.4 (35.2) | 77.9 (29.8) | 30.3 (36.1) |
| Homestead National Monument of America             | 56.4 (20.9) | 43.9 (51.9) | 21.7 (32.4) | 15.5 (21.9) | 22.7 (46.9) | 14.5 (15.9) |
| Hopewell Culture National Historical Park          | 69.6 (21.8) | 38.2 (65)   | 29.6 (36.3) | 65 (35.3)   | 99.4 (1.9)  | 24.8 (11.7) |
| Hopewell Furnace National Historic Site            | 82.8 (9.8)  | 54.7 (24)   | 63 (37.8)   | 87.2 (13.6) | 98.1 (5.8)  | 22.2 (17.4) |
| Horseshoe Bend National Military Park              | 76.8 (12)   | 38.1 (44.5) | 12.2 (15.3) | 73 (42.6)   | 81.6 (32.5) | 22.7 (34.4) |
| Hot Springs National Park                          | 96.1 (11.7) | 71.5 (55)   | 13.7 (23.5) | 48.5 (52.5) | 61.2 (8.8)  | 25.1 (60.2) |
| Hovenweep National Monument                        | 25.8 (50.5) | 70.1 (50.8) | 33.8 (26.4) | 27.8 (35.4) | 74.9 (60.7) | 23.2 (51.7) |
| Hubbell Trading Post National Historic Site        | 28.7 (31.7) | 78.1 (42.2) | 47.1 (45.1) | 6.4 (7.1)   | 69.5 (68)   | 12.4 (29)   |
| Indiana Dunes National Lakeshore                   | 67.2 (16.4) | 11.5 (13.9) | 23.1 (31)   | 61.1 (44.9) | 97.8 (3.3)  | 32.2 (17.6) |
| Isle Royale National Park                          | 99.7 (1)    | 91.9 (13.6) | 33.6 (78.7) | 69.7 (44.8) | 97.3 (4.9)  | 59.8 (49.5) |
| Jean Lafitte National Historical Park and Preserve | 58.5 (70.9) | 38.1 (73)   | 17.6 (35.6) | 49 (73.4)   | 69.5 (60.2) | 33.1 (42)   |
| Jewel Cave National Monument                       | 78.8 (32.5) | 58.2 (15.6) | 14.5 (16.3) | 24 (20.4)   | 85.2 (23.4) | 4.4 (7.5)   |
| John Day Fossil Beds National Monument             | 34.8 (18.8) | 33.9 (35.9) | 5.9 (4.6)   | 14.7 (19.5) | 44.6 (64)   | 3.8 (4.6)   |
| John Muir National Historic Site                   | 21.2 (38.2) | 19.3 (41.1) | 3.1 (3.6)   | 9.7 (17.1)  | 23.6 (28.2) | 41.2 (9.1)  |

| Park                                                     | Bio1        | Bio2        | Bio3        | Bio4        | Bio5        | Bio6        |
|----------------------------------------------------------|-------------|-------------|-------------|-------------|-------------|-------------|
| Johnstown Flood National Memorial                        | 30.7 (13.5) | 29.3 (57.1) | 39.1 (15.9) | 63.6 (13.8) | 83.6 (7.9)  | 34 (20.8)   |
| Joshua Tree National Park                                | 35.5 (60.4) | 52.3 (88.7) | 28.2 (14.9) | 10.8 (18.9) | 66.4 (65.3) | 14.3 (20.9) |
| Kalaupapa National Historical Park                       | 40.4 (3.4)  | 75.3 (41.3) | 12.4 (22.1) | 63 (31.9)   | 61.7 (29.4) | 55.8 (68.9) |
| Kaloko-Honokohau National Historical Park                | 72.6 (20.5) | 92.2 (23.3) | 49.6 (42.5) | 71.3 (17.5) | 88.9 (18.2) | 60.3 (73.6) |
| Katmai National Park and Preserve                        | 74.8 (38.6) | 30.5 (43.6) | 70.2 (21.3) | 43.9 (4)    | 100 (0)     | 80.8 (13.2) |
| Kenai Fjords National Park                               | 40.9 (58.1) | 77.6 (47.4) | 28.4 (19.5) | 26.1 (49.1) | 85.4 (8.4)  | 30.2 (37.7) |
| Kennesaw Mountain National Battlefield Park              | 89.6 (22.6) | 35.3 (34.9) | 5.8 (8.6)   | 78.9 (28.1) | 90.5 (9.2)  | 15.1 (18.5) |
| Kings Mountain National Military Park                    | 52.5 (24.5) | 81.5 (20.2) | 25.7 (15.9) | 77.4 (29.3) | 86 (11.8)   | 35.1 (18.4) |
| Klondike Gold Rush National Historical Park              | 15.5 (27.9) | 49.2 (33.5) | 36.2 (32.8) | 5 (11)      | 66.4 (48.9) | 5.7 (10.4)  |
| Knife River Indian Villages National Historic Site       | 55.4 (6.3)  | 77.2 (48.9) | 13.8 (21.8) | 23.8 (19.9) | 87.2 (16.6) | 5.9 (8.5)   |
| Kobuk Valley National Park                               | 33.2 (35.6) | 21.4 (20.4) | 48.9 (44.9) | 37.1 (44.7) | 71.2 (34.6) | 62.9 (50.4) |
| Lake Clark National Park and Preserve                    | 48.1 (79.3) | 36.2 (29.7) | 43.5 (25.7) | 34.4 (59.3) | 100 (0)     | 57.7 (16.8) |
| Lake Mead National Recreation Area                       | 55.4 (75.8) | 81.9 (44.7) | 55.2 (24.1) | 4 (2.5)     | 57.7 (90.6) | 20.4 (48.3) |
| Lake Meredith National Recreation Area                   | 73.9 (30.7) | 49.5 (39.3) | 11.6 (16.5) | 81.7 (11.2) | 95.9 (7.5)  | 6 (4.4)     |
| Lake Roosevelt National Recreation Area                  | 27.2 (30.2) | 2.2 (2.6)   | 2.5 (3.1)   | 18.1 (35.5) | 46.4 (13.7) | 2.1 (1.8)   |
| Lassen Volcanic National Park                            | 81.2 (42.5) | 67.1 (62.4) | 84.1 (38.6) | 50.5 (31.2) | 72.6 (69.6) | 48 (15.8)   |
| Lava Beds National Monument                              | 41.7 (34.7) | 62.4 (90.1) | 68.4 (90.2) | 19.8 (13.1) | 54.6 (76.9) | 45.2 (27.5) |
| Lewis and Clark National Historical Park                 | 38.5 (29.7) | 50.4 (87.4) | 7.1 (11.1)  | 26.7 (13.7) | 9.1 (9)     | 15.9 (20.9) |
| Lincoln Boyhood National Memorial                        | 81.8 (21.2) | 63.6 (51.9) | 23.1 (35.8) | 63.5 (38.4) | 100 (0)     | 14.8 (7.4)  |
| Little Bighorn Battlefield National Monument             | 36 (16.7)   | 10.4 (10.5) | 2.1 (2.8)   | 12.8 (18)   | 90.8 (13.9) | 5.4 (10.4)  |
| Little River Canyon National Preserve                    | 83 (35.7)   | 31.9 (41.9) | 21.5 (28.1) | 73.7 (34.2) | 72.2 (17)   | 8.4 (10)    |
| Lyndon B. Johnson National Historical Park               | 86.9 (16.1) | 63.1 (48.4) | 16.1 (12.1) | 30.9 (56.6) | 81.9 (34.2) | 13.1 (25.8) |
| Mammoth Cave National Park                               | 84.5 (6.4)  | 87.8 (18.9) | 31.9 (56.7) | 69.5 (32.2) | 99.6 (1.2)  | 9.3 (11.9)  |
| Manassas National Battlefield Park                       | 76.9 (54.9) | 42.1 (74.9) | 39.2 (13.4) | 58.2 (46.4) | 59.1 (69.5) | 23.3 (9.3)  |
| Manzanar National Historic Site                          | 53.3 (53.8) | 43.3 (67.4) | 60.7 (96.9) | 6.4 (10.5)  | 64 (56.6)   | 77.5 (24.6) |
| Marsh-Billings-Rockefeller National Historical Park      | 97.5 (1.3)  | 2.3 (3.8)   | 46.5 (30.5) | 72.2 (26.9) | 70.6 (41.7) | 82.4 (22.1) |
| Mary McLeod Bethune Council House National Historic Site | 79.5 (37.9) | 57.1 (53.8) | 44.2 (13.9) | 66.7 (32.7) | 90.7 (20.4) | 19.2 (14.5) |
| Mesa Verde National Park                                 | 38.4 (48.1) | 36.1 (40)   | 26 (14.7)   | 24.5 (34.4) | 77.5 (43.5) | 24.3 (45.9) |
| Minute Man National Historical Park                      | 93.7 (9.8)  | 1.1 (0.2)   | 14.4 (12.9) | 86.2 (24.5) | 72.2 (43.7) | 66.2 (39.6) |
| Mississippi National River and Recreation Area           | 74.8 (11.8) | 26.1 (67.9) | 20.9 (56.8) | 26.5 (36.8) | 73 (23.1)   | 29.7 (17.7) |
| Missouri National Recreational River                     | 72 (18)     | 56.5 (49.7) | 23.4 (34)   | 32.5 (24.5) | 80.9 (34.2) | 16.6 (16.9) |
| Mojave National Preserve                                 | 38.4 (72)   | 61.8 (95.4) | 45.6 (65.9) | 2.1 (1.8)   | 46 (64.3)   | 23.4 (60.4) |
| Monocacy National Battlefield                            | 65.7 (62.2) | 63 (67)     | 47.8 (13.7) | 49.5 (33.1) | 52.5 (64.7) | 18.6 (9.4)  |
| Montezuma Castle National Monument                       | 44.9 (84.1) | 58.6 (29.4) | 42.7 (58.7) | 6.1 (5.8)   | 41.1 (67.9) | 4.7 (9.6)   |
| Moores Creek National Battlefield                        | 25.6 (48)   | 85.2 (21)   | 34.4 (39.6) | 63.3 (43.8) | 74.9 (31.7) | 20.4 (29.4) |
| Morristown National Historical Park                      | 93.9 (6.3)  | 5.5 (9.6)   | 18.1 (17.3) | 91.2 (13.1) | 95.8 (11.7) | 37.5 (11.6) |
| Mount Rainier National Park                              | 8.6 (14.4)  | 6.3 (9.6)   | 13.5 (20.5) | 29.7 (27.4) | 21.6 (33)   | 5.1 (8.5)   |
| Mount Rushmore National Memorial                         | 76.6 (32.7) | 89.1 (15.1) | 6.1 (10.2)  | 21.6 (24)   | 86 (20.9)   | 3.8 (4.6)   |
| Muir Woods National Monument                             | 19.7 (27.6) | 22.9 (62.8) | 3.9 (2.4)   | 24.4 (39.7) | 55.2 (41.9) | 44.9 (25.9) |
| Natchez Trace Parkway                                    | 52 (18.2)   | 62.5 (49.5) | 30.5 (36.1) | 54.2 (56.8) | 74.1 (23.5) | 22 (29.7)   |

| Park                                           | Bio1        | Bio2        | Bio3        | Bio4        | Bio5        | Bio6        |
|------------------------------------------------|-------------|-------------|-------------|-------------|-------------|-------------|
| National Capital Parks-East                    | 80.8 (34)   | 57.9 (55)   | 44.2 (13.9) | 66.7 (32.7) | 91.3 (18.4) | 19.2 (14.5) |
| National Park of American Samoa                | 80.5 (16.8) | 70.5 (17.9) | 95.9 (6.6)  | 98.6 (2.2)  | 87.1 (9.3)  | 57.9 (14.6) |
| Natural Bridges National Monument              | 25.1 (30.9) | 58.1 (73.4) | 30.5 (52.2) | 13.8 (15.5) | 70.5 (65.8) | 17.2 (39.3) |
| Navajo National Monument                       | 50.9 (15.3) | 95 (15.1)   | 46.4 (64.5) | 5.2 (4.4)   | 58.5 (93.5) | 18.7 (36.9) |
| New River Gorge National River                 | 42.6 (41.2) | 26.4 (34.4) | 25.9 (36.2) | 64.3 (45.2) | 96.9 (5.4)  | 18.8 (14.5) |
| Nez Perce National Historical Park             | 27.4 (25.9) | 5 (8.9)     | 12.5 (31.5) | 9.4 (9.3)   | 64.6 (41.9) | 2.4 (2.7)   |
| Ninety Six National Historic Site              | 64 (47.5)   | 83.4 (25.5) | 10.7 (23.1) | 77.4 (31.8) | 85.3 (8.8)  | 26.8 (2.9)  |
| Niobrara National Scenic River                 | 83.1 (31.7) | 78.5 (16.6) | 9.6 (13.5)  | 15.1 (24.7) | 87.6 (25.5) | 7.2 (4.4)   |
| Noatak National Preserve                       | 37.5 (37.2) | 24.2 (23)   | 55.8 (44.2) | 38.1 (42.8) | 73.9 (28.6) | 56.3 (54)   |
| North Cascades National Park                   | 28.8 (7.2)  | 1.4 (1.2)   | 6.8 (10)    | 22.4 (25.6) | 24 (9.3)    | 3.5 (3.7)   |
| Obed Wild and Scenic River                     | 62.4 (13.4) | 81 (28.9)   | 39.5 (61.1) | 65.3 (41.7) | 82.1 (29.6) | 12.1 (9.1)  |
| Ocmulgee National Monument                     | 20.5 (27.3) | 74.5 (12.1) | 11.7 (24.9) | 72.1 (37.5) | 73.9 (32.5) | 21.1 (27.5) |
| Olympic National Park                          | 31.3 (16.7) | 79.7 (43.7) | 13.9 (18.6) | 29.7 (30.1) | 10 (1.1)    | 15.8 (23.4) |
| Oregon Caves National Monument                 | 31.1 (32)   | 41.5 (99)   | 53.5 (63.3) | 88.9 (21.6) | 24.8 (51.1) | 52.3 (27)   |
| Organ Pipe Cactus National Monument            | 2.1 (1.7)   | 56.1 (76.3) | 49.2 (21.6) | 2.1 (2.8)   | 64 (45)     | 12.5 (20.9) |
| Ozark National Scenic Riverways                | 69 (35.6)   | 20.7 (29.3) | 23.8 (54.9) | 52.8 (53.8) | 31.1 (61.4) | 20.3 (35.9) |
| Padre Island National Seashore                 | 61.7 (2.4)  | 88 (4)      | 19.1 (7.6)  | 13 (18.2)   | 39.3 (62.7) | 13.4 (25.8) |
| Palo Alto Battlefield National Historical Park | 59.1 (13.5) | 46.4 (5.3)  | 27.1 (33.1) | 13.9 (23.3) | 26.6 (47.8) | 31.8 (56.2) |
| Pea Ridge National Military Park               | 89 (16.4)   | 34.9 (46)   | 29.9 (13.3) | 38 (52.8)   | 64 (54.6)   | 8.4 (14)    |
| Pecos National Historical Park                 | 44 (83.6)   | 67.4 (69.2) | 26.1 (37.1) | 46.7 (18.4) | 68.2 (12.6) | 7.8 (11.5)  |
| Petersburg National Battlefield                | 74.2 (38.8) | 50 (64.6)   | 17.5 (23.4) | 63.6 (32.3) | 98.4 (4.9)  | 33.8 (50)   |
| Petrified Forest National Park                 | 14.6 (16.1) | 98.8 (2.4)  | 59.9 (48.6) | 8.1 (9.3)   | 62.6 (55.7) | 10.1 (21.2) |
| Petroglyph National Monument                   | 35.1 (32.8) | 56.2 (66.9) | 44.8 (62.8) | 31.5 (20.3) | 69.1 (29.3) | 5.4 (10.6)  |
| Pictured Rocks National Lakeshore              | 89.8 (14.4) | 81.1 (27.3) | 41 (89.8)   | 70.3 (58.1) | 88.8 (24.7) | 53 (13.1)   |
| Pinnacles National Monument                    | 54.2 (37.7) | 22.2 (35.6) | 64 (34.9)   | 29.1 (24.8) | 60 (23)     | 61.3 (30)   |
| Pipe Spring National Monument                  | 52.3 (38.1) | 100 (0)     | 75.6 (40)   | 3.9 (3)     | 61.8 (75.5) | 9.3 (23.2)  |
| Pipestone National Monument                    | 77.1 (22.5) | 46.2 (57.9) | 34.8 (41.1) | 50.2 (29.8) | 80.9 (16.1) | 26.6 (21.6) |
| Piscataway Park                                | 82.9 (34)   | 54.2 (52.1) | 41.3 (13.5) | 65.8 (28)   | 90.7 (20.4) | 21 (14.3)   |
| Point Reyes National Seashore                  | 16.1 (22.5) | 20.2 (52.3) | 4.2 (3)     | 32.7 (41.3) | 46.3 (45.8) | 45.6 (23.7) |
| Port Chicago Naval Magazine National Memorial  | 24.5 (45.7) | 18.7 (35.2) | 3.5 (3.6)   | 10.5 (20.6) | 16.9 (21.4) | 45.4 (17.8) |
| Presidio of San Francisco                      | 18.4 (21.9) | 28 (76)     | 6.8 (2.8)   | 20.6 (34.6) | 55.5 (33.3) | 44.4 (16.8) |
| Prince William Forest Park                     | 77.2 (53.9) | 46.7 (73.2) | 37.1 (22.5) | 63.9 (39.2) | 69.6 (51.3) | 24.9 (11.8) |
| Pu'uhonua o Honaunau National Historical Park  | 73 (24.6)   | 90.2 (28.2) | 49.7 (26.2) | 70.6 (17.2) | 86.7 (11.8) | 60.2 (74.8) |
| Puukohola Heiau National Historic Site         | 67.9 (31.4) | 92 (17.5)   | 52.9 (56)   | 72.4 (17)   | 94.8 (15.5) | 45.6 (65.9) |
| Rainbow Bridge National Monument               | 53.9 (14.5) | 84.7 (32.3) | 35.8 (60)   | 3.9 (3)     | 60.1 (86)   | 14.6 (31.6) |
| Redwood National Park                          | 83.6 (42.5) | 47.4 (83.6) | 63.7 (23.5) | 90.4 (11.7) | 59 (86)     | 65.3 (12.9) |
| Richmond National Battlefield Park             | 78.3 (44.7) | 56 (53.2)   | 18.2 (30.3) | 60.8 (40.2) | 98.4 (4.9)  | 31.7 (43.9) |
| Rio Grande Wild and Scenic River               | 89.5 (16.9) | 91.1 (17.3) | 1.5 (1.4)   | 24.6 (34.3) | 83.8 (23.1) | 5.7 (11.4)  |
| Rock Creek Park                                | 79.4 (36)   | 60.3 (62)   | 44.2 (13.9) | 66.7 (32.7) | 91.3 (18.4) | 19.2 (14.5) |
| Rocky Mountain National Park                   | 55.2 (13)   | 85.3 (32)   | 32.3 (20.2) | 24.4 (20.4) | 91.8 (11.4) | 8.6 (19.2)  |

| <b>Park</b>                                           | <b>Bio1</b> | <b>Bio2</b> | <b>Bio3</b> | <b>Bio4</b> | <b>Bio5</b> | <b>Bio6</b> |
|-------------------------------------------------------|-------------|-------------|-------------|-------------|-------------|-------------|
| Roosevelt-Vanderbilt Headquarters                     | 96.7 (0.7)  | 64.1 (97.8) | 7.9 (4.9)   | 86.4 (9.9)  | 91.7 (19.4) | 54.8 (35.5) |
| Russell Cave National Monument                        | 82 (29.2)   | 61.2 (59.2) | 29.3 (39.2) | 62 (51.3)   | 75.9 (32.5) | 6.8 (5.5)   |
| Sagamore Hill National Historic Site                  | 95.1 (8.6)  | 9.5 (14.8)  | 4.4 (6.6)   | 88 (8.9)    | 93.1 (16.5) | 44.3 (16.4) |
| Saguaro National Park                                 | 24.3 (50.2) | 6.9 (7.3)   | 36.2 (26.9) | 19.6 (12.4) | 52 (60.4)   | 17.2 (30.4) |
| Saint Croix National Scenic Riverway                  | 80.7 (12.5) | 23 (61.7)   | 23.1 (60.4) | 28.6 (49.2) | 72.3 (35.7) | 36.4 (19.8) |
| Saint-Gaudens National Historic Site                  | 96.4 (3.4)  | 10.6 (26.7) | 37 (12)     | 71.7 (19.4) | 70.9 (40.6) | 80.5 (20.6) |
| Salinas Pueblo Missions National Monument             | 49.3 (77.4) | 76.4 (50.3) | 28.4 (42.4) | 36.9 (10.7) | 77.1 (29.9) | 19 (42.3)   |
| San Antonio Missions National Historical Park         | 81.7 (8.1)  | 90.8 (17.1) | 5.6 (7.6)   | 29.4 (38.4) | 82.4 (39.8) | 10 (20)     |
| San Juan Island National Historical Park              | 49.6 (25.3) | 32.4 (66.3) | 8.9 (8.6)   | 41.5 (35)   | 28.6 (21.3) | 7.2 (12.4)  |
| Sand Creek Massacre National Historic Site            | 37.7 (32.4) | 48.3 (27.7) | 15 (13.9)   | 44.5 (12.8) | 89.1 (15.1) | 9.4 (16.8)  |
| Santa Monica Mountains National Recreation Area       | 55.1 (96.6) | 65.6 (99)   | 64.2 (55.7) | 27.6 (44.7) | 75.9 (57)   | 41.5 (20.8) |
| Saratoga National Historical Park                     | 88.5 (12)   | 53.7 (79.7) | 21.4 (14.5) | 80.6 (11.9) | 77.1 (30.4) | 69.6 (39.3) |
| Saugus Iron Works National Historic Site              | 81.8 (28.2) | 4.3 (9.9)   | 11.2 (23.4) | 80.6 (18.8) | 69.7 (44.4) | 53 (42.9)   |
| Scotts Bluff National Monument                        | 83.5 (16.7) | 59.9 (4.1)  | 17.8 (33.5) | 19.1 (24.3) | 96.5 (7.5)  | 6.7 (15.4)  |
| Sequoia and Kings Canyon National Parks               | 59.3 (60.3) | 55.1 (76.8) | 65.4 (99)   | 5.5 (4.6)   | 66.6 (37.3) | 88.1 (17.4) |
| Shenandoah National Park                              | 73.4 (48.8) | 82.7 (34.4) | 37.6 (21.3) | 46.3 (32.2) | 62.9 (56.1) | 25.5 (26.7) |
| Shiloh National Military Park                         | 80 (3.1)    | 50.4 (65.3) | 41.9 (58.6) | 56 (47.6)   | 72.7 (32.9) | 14 (13.1)   |
| Sitka National Historical Park                        | 34.3 (54.4) | 41.3 (17.7) | 17.5 (30.6) | 9 (17)      | 64.8 (30.7) | 1.8 (0.9)   |
| Sleeping Bear Dunes National Lakeshore                | 80.4 (3.1)  | 87.7 (22.6) | 32 (60.5)   | 71.3 (45.8) | 97.6 (3.9)  | 46.7 (20.3) |
| Stones River National Battlefield                     | 86.8 (5.3)  | 82.3 (35.1) | 44.8 (54.8) | 62.5 (45.2) | 85 (18.5)   | 10.9 (10.3) |
| Sunset Crater Volcano National Monument               | 52.7 (61.5) | 91.8 (16.1) | 73.5 (50.6) | 2.8 (2.7)   | 41.7 (83.6) | 5 (11.5)    |
| Tallgrass Prairie National Preserve                   | 78.6 (6.9)  | 59.4 (32.9) | 11.2 (8)    | 25.3 (28.7) | 76.1 (47)   | 8.8 (5.3)   |
| Theodore Roosevelt National Park                      | 38.4 (39)   | 77.8 (47.3) | 6.8 (13.4)  | 18.7 (19.2) | 90.4 (5.7)  | 4.8 (5.6)   |
| Thomas Stone National Historic Site                   | 82.9 (33)   | 55.4 (55.2) | 35.1 (20)   | 66.7 (32.7) | 91.3 (18.4) | 22.2 (13.2) |
| Timpanogos Cave National Monument                     | 86.7 (9)    | 19.5 (49.5) | 41.5 (57.8) | 45.9 (59.6) | 79.7 (33.8) | 36.8 (40.4) |
| Timucuan Ecological and Historic Preserve             | 26.7 (53.4) | 79.6 (48.3) | 10.5 (28.1) | 74.3 (35.8) | 61.2 (22.6) | 48.9 (35.3) |
| Tonto National Monument                               | 42.7 (60)   | 88.8 (11.4) | 96.5 (7.2)  | 13.7 (19)   | 57.1 (63.3) | 22.5 (31.6) |
| Tumacacori National Historical Park                   | 25.8 (64.2) | 31.1 (29)   | 51.8 (43.9) | 18.3 (3.3)  | 44.7 (48)   | 26 (35.8)   |
| Tuzigoot National Monument                            | 38.1 (83.1) | 76.8 (33)   | 46.5 (61.3) | 5 (3.9)     | 41.8 (77.6) | 5.7 (12.5)  |
| Upper Delaware National Scenic and Recreational River | 91.6 (4.7)  | 3.4 (4.1)   | 18.8 (24.8) | 92.6 (12.2) | 95.1 (13.6) | 52.4 (23)   |
| Valley Forge National Historical Park                 | 85 (8.7)    | 23.3 (17.3) | 41.7 (28.9) | 85.5 (8.6)  | 95.8 (12.6) | 25.3 (13.9) |
| Valor in the Pacific National Monument                | 32.3 (44.1) | 53.2 (75.6) | 61.3 (75.9) | 22.4 (6)    | 45.3 (55.1) | 45.5 (44.5) |
| Vicksburg National Military Park                      | 49.1 (9.1)  | 32.2 (5.9)  | 20.2 (31.7) | 50.1 (62.8) | 71 (25.9)   | 17.5 (21.3) |
| Virgin Islands National Park                          | 28.1 (19.4) | 1.4 (1.2)   | 8.5 (3.5)   | 61.9 (30.5) | 13.6 (20.7) | 17.4 (14.1) |
| Voyageurs National Park                               | 83.6 (13.4) | 4.3 (9.9)   | 19.5 (23.7) | 31.8 (46.4) | 73.5 (56.6) | 54.5 (28.8) |
| Walnut Canyon National Monument                       | 51.5 (77)   | 86.7 (20.5) | 68.6 (56.6) | 2.8 (2.7)   | 39.7 (77.6) | 5 (11.5)    |
| War In The Pacific National Historical Park           | 63.4 (18.2) | 49.4 (20.4) | 60.7 (14.3) | 53.4 (21.2) | 69.1 (27.1) | 50.1 (7.6)  |
| Washita Battlefield National Historic Site            | 85.9 (35)   | 56.5 (27.2) | 11.8 (7)    | 38.6 (33)   | 66.1 (55.1) | 6 (4.4)     |
| Weir Farm National Historic Site                      | 96.3 (5.5)  | 1.1 (0.2)   | 11.4 (18.8) | 89.8 (8.1)  | 91 (19.4)   | 47.1 (20.6) |
| Whiskeytown National Recreation Area                  | 20.6 (11.5) | 29.4 (83.3) | 20.5 (40.1) | 15.7 (12.5) | 47.3 (79.5) | 68.9 (18.9) |

| <b>Park</b>                                     | <b>Bio1</b> | <b>Bio2</b> | <b>Bio3</b> | <b>Bio4</b> | <b>Bio5</b> | <b>Bio6</b> |
|-------------------------------------------------|-------------|-------------|-------------|-------------|-------------|-------------|
| White Sands National Monument                   | 46.9 (90.3) | 72.3 (56.8) | 22.9 (22.4) | 64.7 (35.7) | 82.7 (28.2) | 18.7 (40)   |
| Whitman Mission National Historic Site          | 38.3 (25.1) | 47.4 (4.2)  | 4.3 (1.6)   | 12.6 (17.5) | 46.2 (29.4) | 2.5 (2.8)   |
| Wilson's Creek National Battlefield             | 73.3 (16.9) | 73.3 (28.2) | 28.6 (38.8) | 39.5 (56.9) | 73.3 (33.9) | 7.7 (4.8)   |
| Wind Cave National Park                         | 77.4 (31.5) | 71.4 (9)    | 6.4 (11.2)  | 21.5 (20.6) | 84.5 (23.6) | 3.7 (5.6)   |
| Wolf Trap National Park for the Performing Arts | 74.3 (53.7) | 54.6 (73.9) | 41 (11.4)   | 57.9 (27.1) | 68.4 (48.4) | 22.7 (13.9) |
| Wrangell - St Elias National Park and Preserve  | 12.3 (17.1) | 30.9 (29.4) | 4.6 (10.6)  | 21.5 (38.5) | 90.5 (9.2)  | 3.4 (4.6)   |
| Wright Brothers National Memorial               | 65.3 (37.5) | 76 (31.4)   | 15.8 (31.9) | 54.3 (56.1) | 89.8 (28.2) | 16.2 (28.5) |
| Wupatki National Monument                       | 56.8 (55.5) | 98.5 (2.4)  | 75.2 (51.8) | 2.8 (2.7)   | 47.9 (96.9) | 6.7 (15.4)  |
| Yellowstone National Park                       | 51.7 (22)   | 15.3 (18.7) | 35 (37.7)   | 26.4 (26.6) | 95.7 (9.7)  | 8.8 (16.2)  |
| Yosemite National Park                          | 42.2 (46.2) | 53.4 (80.4) | 67.7 (91.2) | 24 (30.8)   | 59.3 (58.2) | 68.3 (31.9) |
| Yucca House National Monument                   | 33.3 (62.2) | 51 (47.4)   | 23.8 (26.8) | 26.7 (34.4) | 79.9 (48.3) | 20.7 (42.5) |
| Yukon-Charley Rivers National Preserve          | 6.5 (9.5)   | 3 (5.7)     | 20 (24.5)   | 24 (19.7)   | 43 (13.2)   | 9.6 (16.2)  |
| Zion National Park                              | 49.9 (32.8) | 100 (0)     | 75.9 (31.3) | 3.5 (1.9)   | 62.2 (74.1) | 9.3 (22.2)  |
